# Supplementary material
Source: PubMed Central journal article supplement (PMC6601336)
Supplement: NIHMS1029877-supplement-SI.pdf [file NIHMS1029877-supplement-SI.pdf]

1 **SUPPLEMENTAL INFORMATION FOR:**

2 **An autoinducer analog reveals an alternative mode of ligand binding for the LasR**  
3 **quorum-sensing receptor**

4  
5 Jon E. Paczkowski<sup>1</sup>, Amelia R. McCreedy<sup>1</sup>, Jian-Ping Cong<sup>1,2</sup>, Zhijie Li<sup>3</sup>, Philip D. Jeffrey<sup>1</sup>,  
6 Chari D. Smith<sup>1</sup>, Brad R. Henke<sup>4</sup>, Frederick M. Hughson<sup>1</sup>, and Bonnie L. Bassler<sup>1,2,\*</sup>

7  
8 <sup>1</sup>Princeton University, Department of Molecular Biology, Princeton, NJ 08544, <sup>2</sup>Howard  
9 Hughes Medical Institute, Chevy Chase, MD 20815, <sup>3</sup>North Carolina State University,  
10 Department of Molecular and Structural Biochemistry, Raleigh, NC 27695, <sup>4</sup>Opti-Mol  
11 Consulting, LLC, Cary, NC 27513

12  
13 \*To whom correspondence should be addressed: Prof. Bonnie L. Bassler, Department of  
14 Molecular Biology, Princeton University, 329 Lewis Thomas Laboratory, Princeton, NJ  
15 08544. Email: bbassler@princeton.edu

16  
17 **Supplemental Information contents:**

18 Supplemental Figure 1. Synthesis of novel LasR ligand analogs.

19 Supplemental Figure 2. Electron density for ligands in the LasR LBD and LasR LBD  
20 T75V/Y93F/A127W structures.

21 Supplemental Figure 3. The sulfonyl group on the BB0221 ligand drives enhanced  
22 potency with LasR mutants.

23 Supplemental Figure 4. 3OC<sub>12</sub>HSL and synthetic agonists exhibit reduced potency with  
24 LasR R61A.

25 Supplemental Figure 5. Comparison of the CviR LBD:CL and LasR LBD:mBTL binding  
26 pockets.

27 Supplemental Table 1. Primers used in this study.

28 Supplemental Table 2. Strains used in this study.

29 Supplemental Table 3. R<sup>2</sup> values for nonlinear regression analysis.

30 Supplemental Methods

31 References

32 **SUPPLEMENTAL INFORMATION**

33 **Supplemental Figure 1.** *Synthesis of novel LasR ligand analogs.* Synthetic routes for A)  
34 BB0231, BB0232, and BB0233 and B) BB0020, BB0126, BB0272, and BB0273. The  
35 scheme for the synthesis of BB0221 is not shown because it is only one step from the  
36 intermediate we show in the scheme and procedures for attaching the lactone head group  
37 are known. See Supplemental Methods for details. Reagents and conditions for panel A:  
38 (a) (Boc)<sub>2</sub>O, Et<sub>3</sub>N, dioxane, rt (i.e., room temperature); (b) *N,O*-  
39 dimethylhydroxylamine·HCl, Et<sub>3</sub>N, PYBOP, DCM, rt; (c) vinylmagnesium bromide, THF, -  
40 78 °C; (d) Grubb's 2<sup>nd</sup>-gen catalyst, DCM, rt; (e) (Boc)<sub>2</sub>O, DMAP, CH<sub>3</sub>CN, rt; (f) NaH,  
41 trimethyloxosulfonium iodide, DMSO, 50 °C; (g) TFA, DCM, rt; (h) CeCl<sub>3</sub>·7H<sub>2</sub>O, NaI,  
42 CH<sub>3</sub>CN, rt; (i) Li(OtBu)<sub>3</sub>AlH, EtOH, -78 °C to rt; (j) HCl/EtOAc, rt; (k) LiBH<sub>4</sub>, THF, -78 °C  
43 to rt; (l) dodecanoyl chloride, Et<sub>3</sub>N, DCM, rt. Reagents and conditions for panel B: (a)  
44 K<sub>2</sub>CO<sub>3</sub>, DMF, 100 °C; (b) *m*-CPBA, CHCl<sub>3</sub> rt; (c) LiOH·H<sub>2</sub>O, THF/H<sub>2</sub>O, rt; (d) one of three  
45 amide coupling conditions were used: (i) EDCI, HOBT, DIPEA, DMF, rt; (BB0272,  
46 BB0273) (ii) isopropyl chloroformate, Et<sub>3</sub>N, THF, 0 °C to rt; (BB0126) (iii) oxalyl chloride,  
47 cat. DMF, DIPEA, DCM, rt. (BB0020).

48

49 **Supplemental Figure 2.** *Electron density for ligands in the LasR LBD and LasR LBD*  
50 *T75V/Y93F/A127W structures.* A simulated annealing omit map, contoured at 1σ, shows  
51 the electron density (gray) around A) mBTL (red), B) BB0020 (green), c) BB0126 (blue)  
52 in the LasR LBD, and D) BB0126 (blue) in the LasR LBD T75V/Y93F/A127W.

53

54 **Supplemental Figure 3.** *The sulfonyl group on the BB0221 ligand drives enhanced*  
55 *potency with LasR mutants.* A) Dose response analyses using the *E. coli lasB-lux*  
56 reporter strain expressing WT LasR (black), LasR T75V (red), LasR Y93F (blue), and  
57 LasR A127W (purple) to BB0221. B) As in panel A with LasR T75V/Y93F (orange), LasR  
58 Y93F/A127W (green), LasR T75V/A127W (magenta), and LasR T75V/Y93F/A127W  
59 (cyan). Dose response data are depicted as curve fits with the raw data plotted as  
60 individual points. Error bars represent SEM,  $n=3$ .

61  
62 **Supplemental Figure 4.** *3OC<sub>12</sub>HSL and synthetic agonists exhibit reduced potency with*  
63 *LasR R61A.* A) Dose response analyses using the *E. coli lasB-lux* reporter strain  
64 expressing WT LasR (black) and LasR R61A (brown) to 3OC<sub>12</sub>HSL, B) mBTL, C)  
65 BB0020, D) BB0126, E) BB0221, F) BB0231, G) BB0232, H) BB0233, I) BB0272, and J)  
66 BB0273. Dose response data are depicted as curve fits with the raw data plotted as  
67 individual points. Error bars represent SEM,  $n=3$ .

68  
69 **Supplemental Figure 5.** *Comparison of the CviR LBD:CL and LasR LBD:mBTL binding*  
70 *pockets.* A) Structures of CL and mBTL. B) Overlay of the crystal structures of CviR  
71 LBD:CL (CviR: blue; CL: gold, PDB: 3QP5<sup>62</sup>) and LasR LBD:mBTL (LasR: green; mBTL:  
72 red). C) Docking of CL (gold) in the LBD of LasR compared to crystal structure of the  
73 LasR LBD containing mBTL (red).

74

75

76

77 **Supplemental Table 1. Primers used in this study**

| <b>Name</b> | <b>Sequence</b>                      | <b>Description</b>                   |
|-------------|--------------------------------------|--------------------------------------|
| oARM203     | cggttttctgagctggaacgc                | LasR forward primer                  |
| oARM204     | aacggccataatggccgctac                | LasR reverse primer                  |
| oJP779      | acagtgactgaccactgggtcgaccgcgc        | lasRT75V forward                     |
| oJP780      | gcgcggtcgaccagtggtcagtcactgt         | lasRT75V reverse                     |
| oJP819      | gctgaggctcagccagccgagttcgccg         | lasRA127W forward                    |
| oJP820      | cggcgaactcggctggctgagcctcagc         | lasRA127W reverse                    |
| oJP933      | gtcgtaatgctcgccagggccggg             | lasRR61A forward                     |
| oJP934      | cccggccgcctgggcccagcattacgac         | lasRR61A reverse                     |
| oARM449     | cgcgctggaagatggacgggtcccag           | lasRY93F forward                     |
| oARM450     | ctgggaaccgtccatctccagacgcg           | lasRY93F reverse                     |
| oARM455     | taattaagctccgaactggaaaagtggtatgtcgcc | lasR pEXG2 upstream forward HindIII  |
| oARM456     | tattagtcgacgctcgccgacctgagaggcaaga   | lasR pEXG2 downstream reverse Sall   |
| oARM470     | taattgatccccgaactggaaaagtggtatgtcgcc | pUCP18 lasR upstream forward BamHI   |
| oARM471     | tattagaattcgctcgccgacctgagaggcaaga   | pUCP18 lasR downstream reverse EcoRI |
| oARM472     | ctcgactaaccagatgccg                  | pUCP18 lasR overlapping forward      |
| oARM473     | tggagcgaacgacctacac                  | pUCP18 lasR overlapping reverse      |

78

79

80

81

82

83

84

85

86

87

88

89

90 **Supplemental Table 2. Strains used in this study**

| Name            | Description                                                                                                                                                              | Source                                 |
|-----------------|--------------------------------------------------------------------------------------------------------------------------------------------------------------------------|----------------------------------------|
| UCBPP-PA14      | Wild type, generous gift from Dr. George O'Toole                                                                                                                         | (Kukavica-Ibruli <i>et al.</i> , 2008) |
| SM51            | <i>P. aeruginosa</i> $\Delta lasI$                                                                                                                                       | (Mukherjee <i>et al.</i> , 2017)       |
| JP113           | <i>E. coli</i> pBad-A- <i>lasR</i> PA14 pCS26- <i>lasB-lux</i>                                                                                                           | (Paczkowski <i>et al.</i> , 2017)      |
| AM33            | <i>E. coli</i> pBad-A- <i>lasR</i> -Y93F PA14 pCS26- <i>lasB-lux</i>                                                                                                     | This study                             |
| JP148           | <i>E. coli</i> pBad-A- <i>lasR</i> -T75V PA14 pCS26- <i>lasB-lux</i>                                                                                                     | This study                             |
| JP149           | <i>E. coli</i> pBad-A- <i>lasR</i> -T75V/Y93F PA14 pCS26- <i>lasB-lux</i>                                                                                                | This study                             |
| JP150           | <i>E. coli</i> pBad-A- <i>lasR</i> -A127W PA14 pCS26- <i>lasB-lux</i>                                                                                                    | This study                             |
| JP151           | <i>E. coli</i> pBad-A- <i>lasR</i> -Y93F/A127W PA14 pCS26- <i>lasB-lux</i>                                                                                               | This study                             |
| JP152           | <i>E. coli</i> pBad-A- <i>lasR</i> -T75V/A127W PA14 pCS26- <i>lasB-lux</i>                                                                                               | This study                             |
| JP153           | <i>E. coli</i> pBad-A- <i>lasR</i> -T75V/Y93F/A127W PA14 pCS26- <i>lasB-lux</i>                                                                                          | This study                             |
| JP154           | <i>P. aeruginosa</i> $\Delta lasI$<br>LasR-T75V/Y93F/A127W                                                                                                               | This study                             |
| JP156           | <i>E. coli</i> pBad-A- <i>lasR</i> -R61A PA14 pCS26- <i>lasB-lux</i>                                                                                                     | This study                             |
| JP128           | <i>E. coli</i> DH-IBP-6xHis- <i>lasR</i> :LBD (1-170)                                                                                                                    | (Paczkowski <i>et al.</i> , 2017)      |
| JP155           | <i>E. coli</i> DH-IBP-6xHis- <i>lasR</i> :LBD-T75V/Y93F/A127W (1-170)                                                                                                    | This study                             |
| SM10 <i>pir</i> | <i>E. coli thi thr leu tonA lacY supE recA::RP4-2-Tc::Mu</i>                                                                                                             | (Simon <i>et al.</i> , 1983)           |
| pEXG2           | Allelic exchange vector with pBR origin, gentamicin resistance, <i>sacB</i> , generous gift from Dr. Joseph Mougous                                                      | (Borlee <i>et al.</i> , 2010)          |
| pUCP18          | <i>E. coli-Pseudomonas</i> Amp <sup>r</sup> shuttle vector                                                                                                               | (Schweizer., 1991)                     |
| BL21 (DE3)      | <i>E. coli</i> B F- <i>dcm ompT hsdS(r - m -) gal</i> $\lambda$ (DE3)                                                                                                    | Agilent                                |
| One Shot Top10  | <i>E. coli</i> F- <i>mcrA</i> $\Delta(mrr-hsdRMS-mcrBC)$ $\phi 80lacZ\Delta M15 \Delta lacX74 recA1 araD139 \Delta(ara-leu)7697 galJ galK rpsL$ (StrR) <i>endA1 nupG</i> | Thermo-Fisher                          |

91  
92  
93  
94  
95  
96  
97  
98  
99  
100  
101  
102

103 **Supplemental Table 3. R<sup>2</sup> values for nonlinear regression analysis.**

104 **Compound Class**

|                     | I                     | I    | I      | II     | II     | I      | II     | II     | III    | III    |
|---------------------|-----------------------|------|--------|--------|--------|--------|--------|--------|--------|--------|
| LasR                | 3OC <sub>12</sub> HSL | mBTL | BB0020 | BB0126 | BB0221 | BB0231 | BB0232 | BB0233 | BB0272 | BB0273 |
| WT                  | 0.9                   | 0.9  | 0.8    | 0.7    | 0.5    | 0.7    | 0.7    | 0.8    | 0.5    | 0.6    |
| T75V                | 0.7                   | 0.8  | 0.8    | 0.5    | 0.5    | 0.5    | 0.8    | 0.7    | NR     | NR     |
| Y93F                | 0.8                   | 0.9  | 0.8    | 0.5    | 0.4    | 0.8    | 0.7    | 0.8    | NR     | NR     |
| A127W               | 0.8                   | 0.9  | 0.8    | 0.5    | 0.5    | 0.7    | NR     | NR     | NR     | NR     |
| T75V/Y93F           | 0.9                   | 0.8  | 0.8    | 0.6    | 0.4    | 0.7    | 0.6    | 0.8    | NR     | NR     |
| T75V/A127W          | 0.9                   | 0.9  | 0.8    | 0.7    | 0.6    | 0.6    | NR     | NR     | 0.6    | 0.5    |
| Y93F/A127W          | 0.7                   | 0.8  | 0.8    | 0.6    | 0.4    | 0.7    | NR     | NR     | NR     | 0.5    |
| T75V/Y93F/A127W     | 0.9                   | 0.9  | 0.9    | 0.7    | 0.7    | 0.6    | NR     | NR     | 0.6    | 0.7    |
| R61A                | 0.8                   | 0.8  | 0.8    | 0.6    | 0.5    | 0.7    | 0.5    | 0.5    | NR     | NR     |
| NR = non-responsive |                       |      |        |        |        |        |        |        |        |        |

105

106

# Supplemental Figure 1

## A

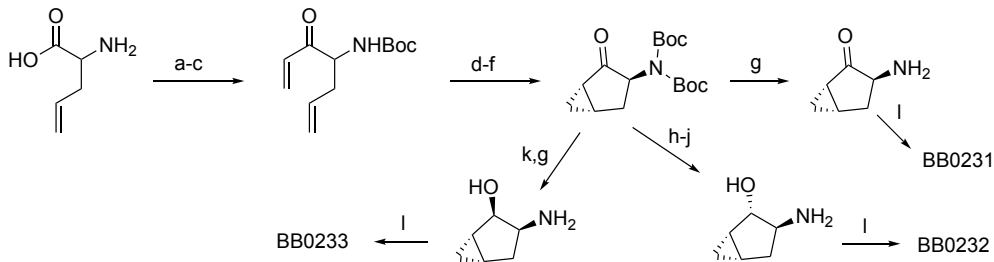

## B

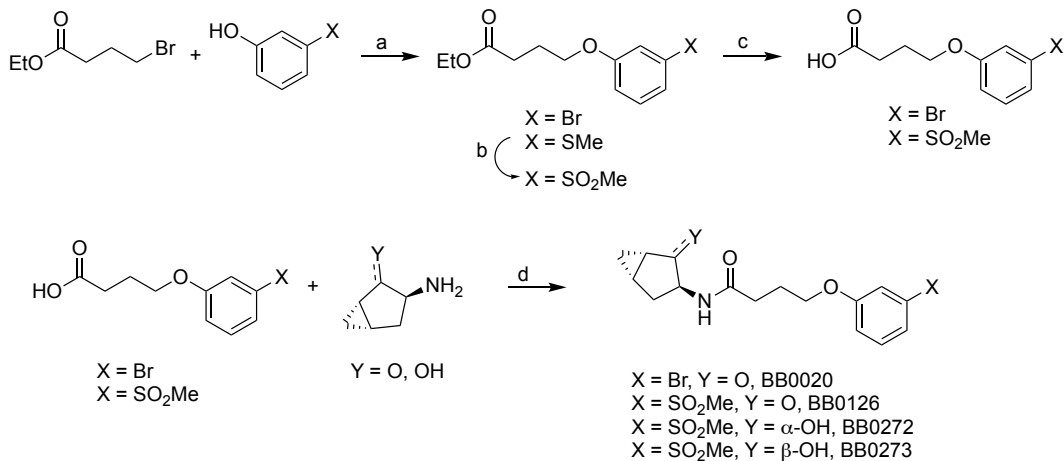

## Supplemental Figure 2

**A**

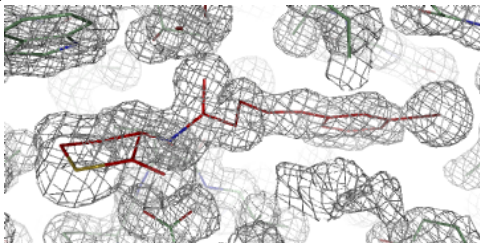

**B**

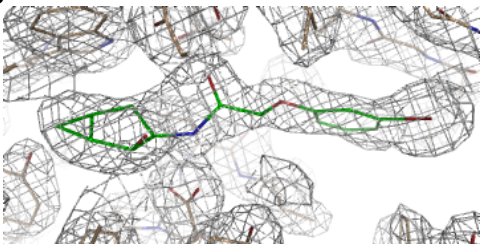

**C**

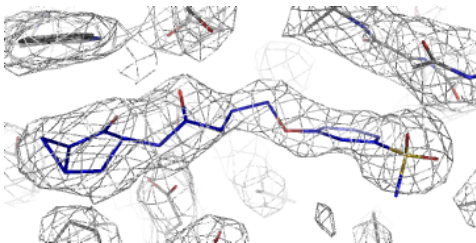

**D**

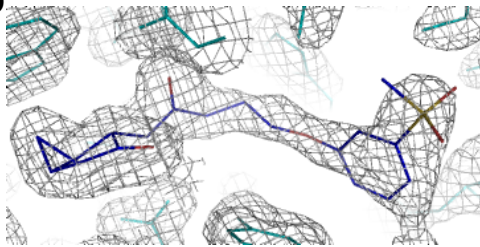



# Supplemental Figure 3

## A

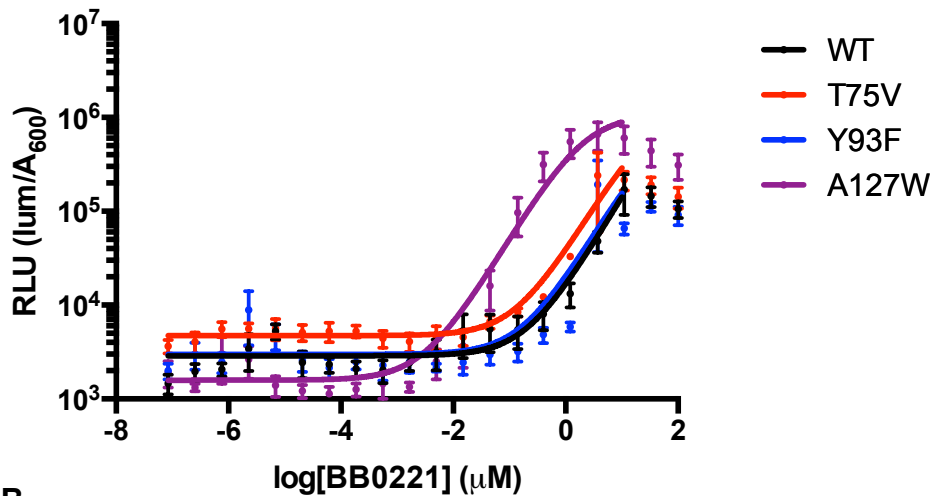

## B

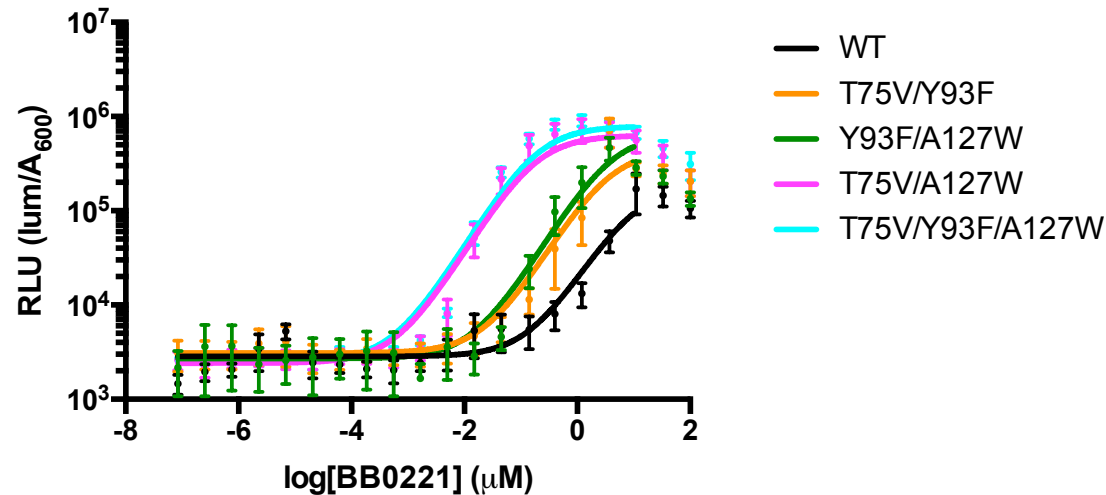

# Supplemental Figure 4

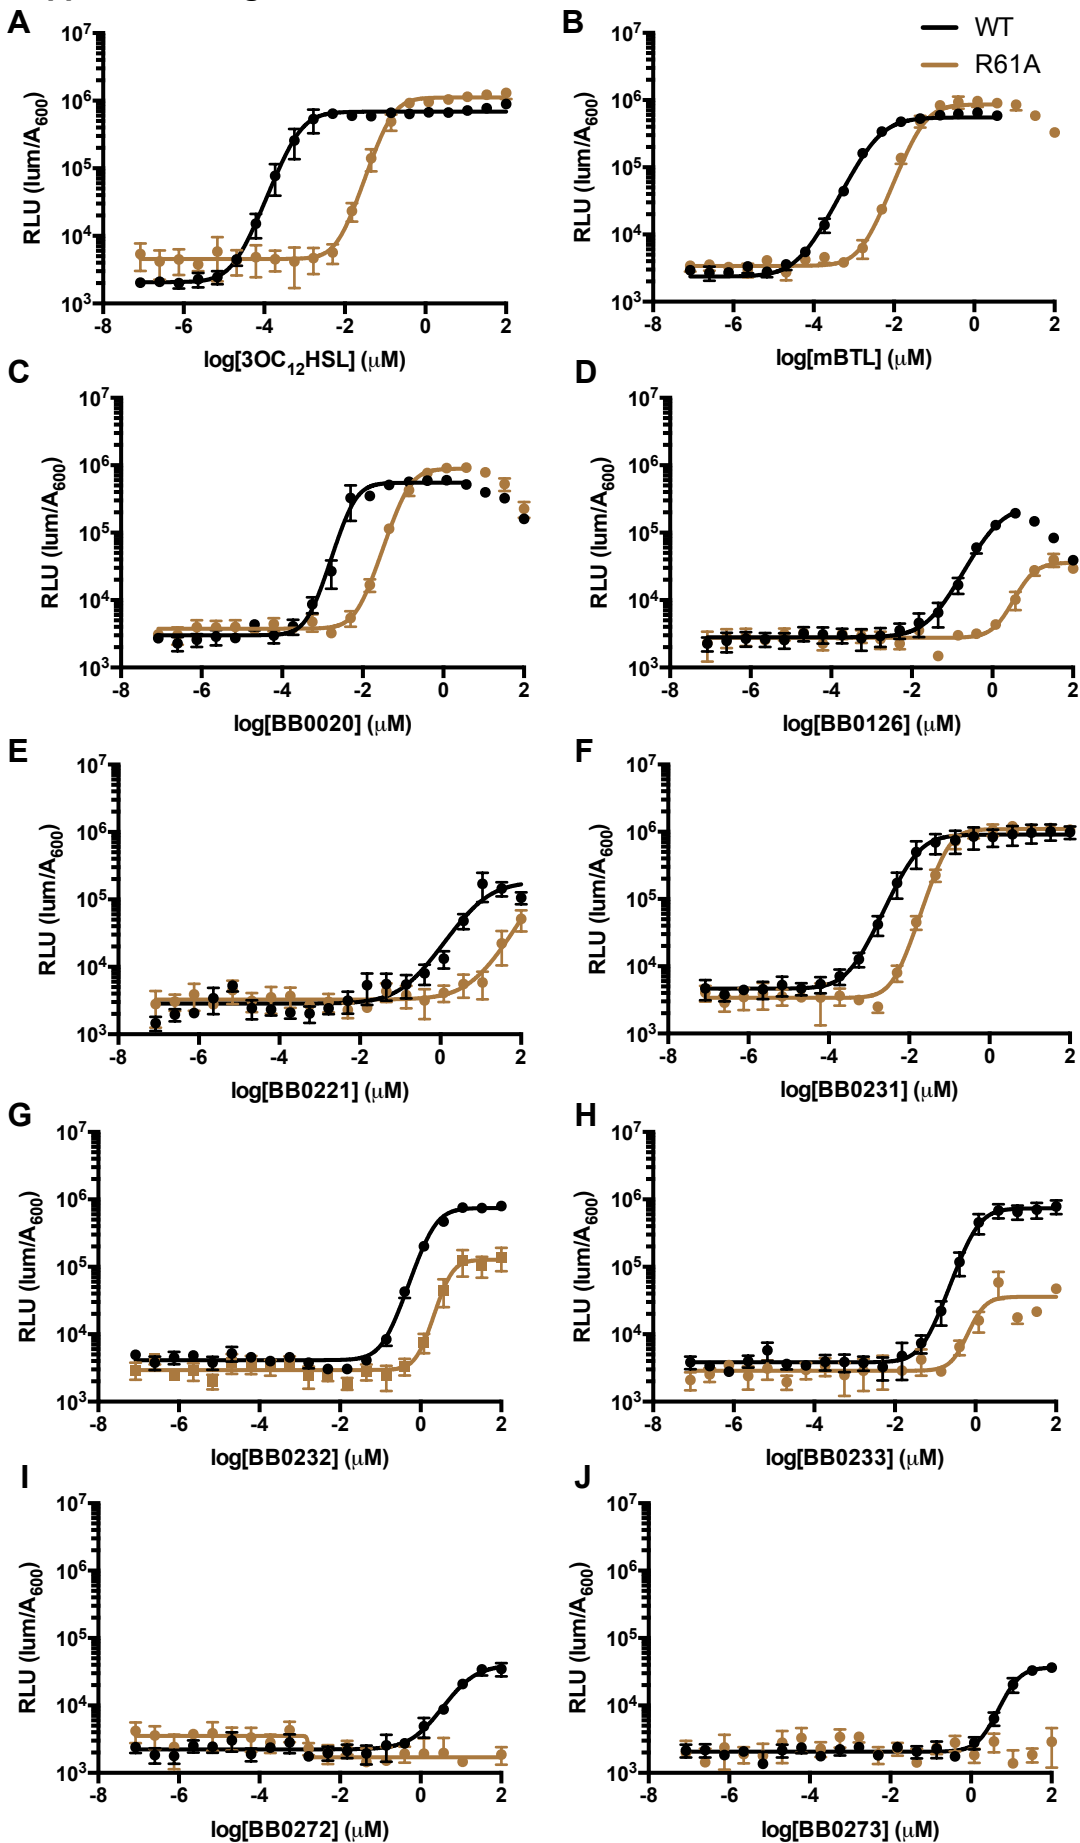

# Supplemental Figure 5

**A**

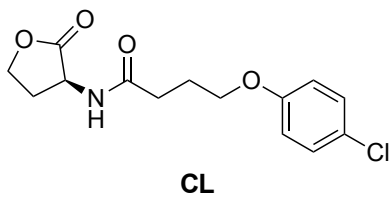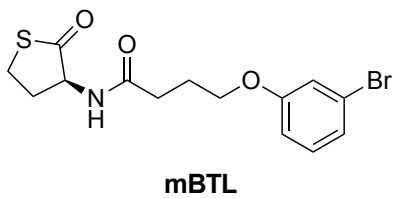

**B**

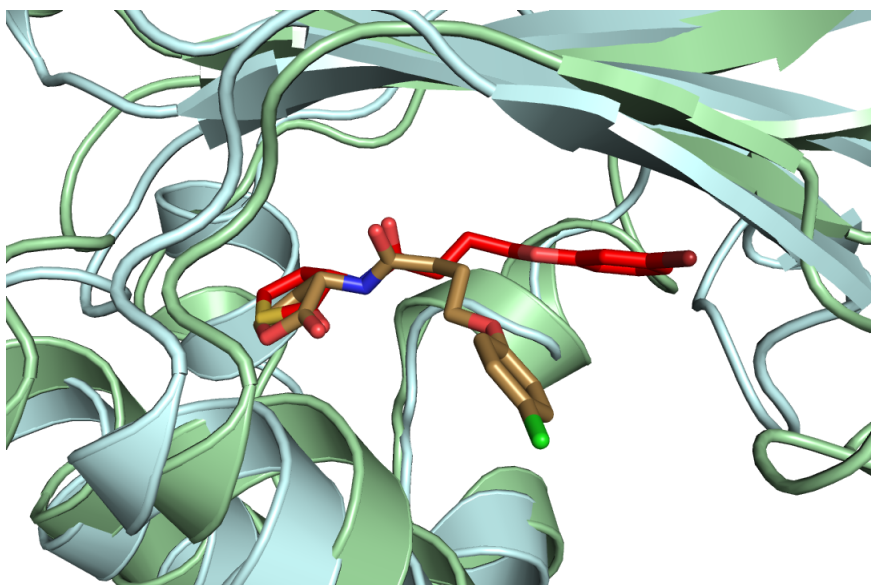

**C**

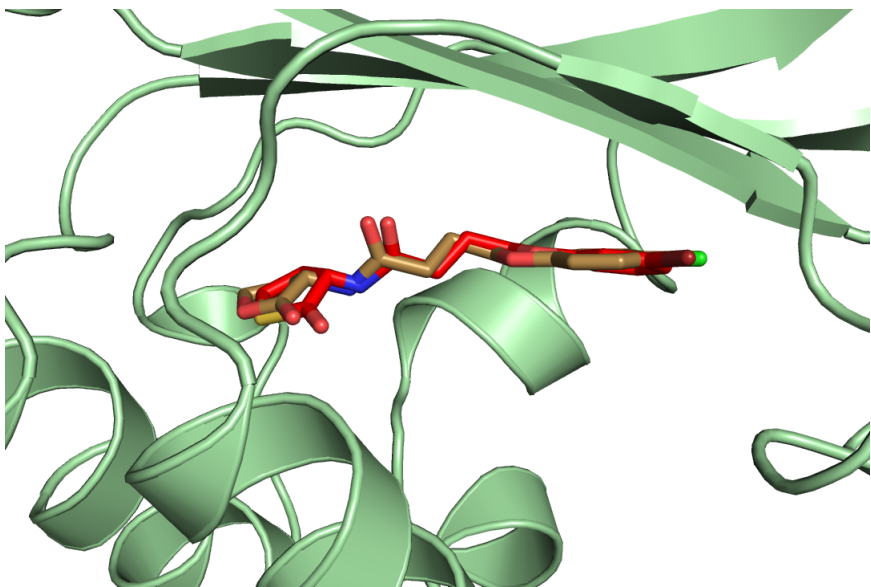

## SUPPLEMENTAL METHODS

### Abbreviations:

As used herein the symbols and conventions used in these processes are consistent with those used in the contemporary scientific literature, for example, the Journal of the American Chemical Society or the Journal of Biological Chemistry. Specifically, the following abbreviations may be used:

|                                                       |                                                     |
|-------------------------------------------------------|-----------------------------------------------------|
| g (grams);                                            | mg (milligrams);                                    |
| L (liters);                                           | mL (milliliters);                                   |
| $\mu$ L (microliters);                                | psi (pounds per square inch);                       |
| M (molar);                                            | mM (millimolar);                                    |
| $\mu$ M (micromolar)                                  | MHz (megahertz);                                    |
| mol (moles);                                          | mmol (millimoles);                                  |
| rt (room temperature);                                | hr (hours);                                         |
| min (minutes);                                        | TLC (thin layer chromatography);                    |
| mp (melting point);                                   | RP (reverse phase);                                 |
| $T_r$ (retention time);                               | TFA (trifluoroacetic acid);                         |
| Et <sub>3</sub> N (triethylamine);                    | THF (tetrahydrofuran);                              |
| TFAA (trifluoroacetic anhydride);                     | CDCl <sub>3</sub> (deuterated chloroform);          |
| CD <sub>3</sub> OD (deuterated methanol);             | DMSO (dimethylsulfoxide);                           |
| SiO <sub>2</sub> (silica);                            | atm (atmosphere);                                   |
| EtOAc (ethyl acetate);                                | CHCl <sub>3</sub> (chloroform);                     |
| HCl (hydrochloric acid);                              | Ac (acetyl);                                        |
| DMF (N,N-dimethylformamide);                          | Me (methyl);                                        |
| Cs <sub>2</sub> CO <sub>3</sub> (cesium carbonate);   | EtOH (ethanol);                                     |
| MeOH (methanol);                                      | p-TsOH (p-toluenesulfonic acid);                    |
| DCM (dichloromethane);                                | DCE (dichloroethane);                               |
| K <sub>2</sub> CO <sub>3</sub> (potassium carbonate); | Na <sub>2</sub> CO <sub>3</sub> (sodium carbonate); |
| NaHCO <sub>3</sub> (sodium bicarbonate);              | ACN (acetonitrile);                                 |

|                                                                            |                                                                    |
|----------------------------------------------------------------------------|--------------------------------------------------------------------|
| PE (petroleum ether);                                                      | Hex (hexanes);                                                     |
| H <sub>2</sub> SO <sub>4</sub> (sulfuric acid);                            | Na <sub>2</sub> S <sub>2</sub> O <sub>3</sub> (sodium thiosulfate) |
| Et <sub>3</sub> N (triethylamine);                                         | Na <sub>2</sub> SO <sub>4</sub> (sodium sulfate);                  |
| MTBE (methyl tert-butyl ether);                                            | Boc (tert-butoxycarbonyl);                                         |
| DIPEA (diisopropylethylamine);                                             | IPA (isopropanol);                                                 |
| DMAP (dimethylaminopyridine)                                               | EDCI (1-Ethyl-3-(3-dimethylaminopropyl)carbodiimide)               |
| HOBt (hydroxybenzotriazole)                                                | NMP (N-methyl-2-pyrrolidone)                                       |
| HOSu (N-hydroxysuccinimide)                                                | <i>m</i> -CPBA (m-chloroperoxybenzoic acid)                        |
| PYBOP (benzotriazol-1-yl-oxytripyrrolidinophosphonium hexafluorophosphate) |                                                                    |

Unless otherwise indicated, all temperatures are expressed in °C (degrees Centigrade). All reactions were conducted at room temperature unless otherwise noted. <sup>1</sup>H-NMR spectra were recorded on a Varian VXR-400, or a Varian Unity-400 at 400 MHz field strength. Chemical shifts are expressed in parts per million (ppm, δ units). Coupling constants (*J*) are in units of hertz (Hz). Splitting patterns describe apparent multiplicities and are designated as s (singlet), d (doublet), t (triplet), q (quartet), m (multiplet), or br (broad). The mass spec was run on a Sciex API 100 using electrospray ionization (ESI). The LCMS was run using a C-18 reverse phase column (2.1 ID, 3.5 micron, 50 mm). The column conditions were 98% H<sub>2</sub>O with 0.05% TFA and 2% MeOH to 100% MeOH over 5.5 minutes. Analytical thin layer chromatography was used to verify the purity as well as to follow the progress of reaction(s). Unless otherwise indicated, all final products were at least 95% pure as judged by HPLC-MS.

*rel*-(1*S*,3*S*,5*S*)-3-aminobicyclo[3.1.0]hexan-2-one

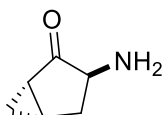

Step 1: 2-(*tert*-butoxycarbonylamino)pent-4-enoic acid

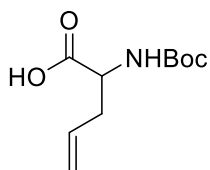

To a suspension of 2-aminopent-4-enoic acid (35.0 g, 304 mmol, 1.00 eq) in dioxane (1.20 L) and H<sub>2</sub>O (30 mL) was added *tert*-butoxycarbonyl *tert*-butyl carbonate (139.33 g,

638.4 mmol, 147 mL, 2.10 eq), and Et<sub>3</sub>N (76.9 g, 760 mmol, 105 mL, 2.50 eq). The mixture was stirred at rt for 12 hr. The reaction mixture was concentrated, and the residue was diluted with EtOAc (400 mL) and extracted with NaHCO<sub>3</sub> (500 mL); the organic layer was discarded. The aqueous layer was washed with EtOAc (2 x 400 mL). The aqueous was acidified to pH=3 with 2N H<sub>2</sub>SO<sub>4</sub> and then extracted with EtOAc (3 x 500 mL). The combined organic layer was concentrated to give 2-(*tert*-butoxycarbonylamino)pent-4-enoic acid (116 g, 538.9 mmol, 88% yield) as a white solid. <sup>1</sup>HNMR: (400 MHz, CDCl<sub>3</sub>) δ 9.06 (s, br, 1H), 5.77 (m, 1H), 5.20 (m, 2H), 5.09 (m, 1H), 4.43 (m, 1H), 2.65 (m, 2H), 1.47 (s, 9H).

Step 2: *tert*-butyl N-[1-[methoxy(methyl)carbamoyl]but-3-enyl]carbamate

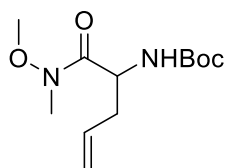

To a solution of 2-(*tert*-butoxycarbonylamino)pent-4-enoic acid (60 g, 278.7 mmol, 1.00 eq) in DCM (600 mL) was added Et<sub>3</sub>N (56.4 g, 557.5 mmol, 77.3 mL, 2.00 eq) and PYBOP (174.0 g, 334.5 mmol, 1.20 eq). The mixture was stirred at rt for 1 hr, then *N*-methoxymethanamine hydrochloride (29.91 g, 306.63 mmol, 1.10 eq) was added. The final mixture was stirred at rt for 11 hr. The reaction mixture was diluted with DCM (300 mL), washed with sub-saturated aqueous citric acid (3 x 400 mL) followed by brine (400 mL), dried over Na<sub>2</sub>SO<sub>4</sub> and concentrated to give a residue. The residue was purified by silica gel column chromatography (PE:EtOAc = 30:1 to 8:1) to give *tert*-butyl N-[1-[methoxy(methyl)carbamoyl]but-3-enyl]carbamate (57.40 g, 79% yield) as a white solid. <sup>1</sup>H NMR (400 MHz, CDCl<sub>3</sub>) δ 5.79 (m, 1H), 5.16 (m, 3H), 4.76 (s, br, 1H), 3.78 (s, 3H), 3.21 (s, 3H), 2.49 (m, 1H), 2.37 (m, 1H), 1.43 (s, 9H).

Step 3: *tert*-butyl N-(1-allyl-2-oxo-but-3-enyl)carbamate

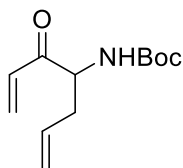

To a solution of vinylmagnesiumbromide (1 M, 420 mL, 3.0 eq) in THF (600 mL) was added *tert*-butyl N-[1-[methoxy(methyl)carbamoyl]but-3-enyl]carbamate (36.0 g, 139.4 mmol, 1.00 eq) at -78 °C. The mixture was allowed to warm to rt and the reaction was stirred 12 hr. The reaction mixture was diluted with EtOAc (1200 mL) and poured into 1N HCl (1500 mL) at 0 °C. The layers were separated, and the organic layer was washed with 1N HCl (1000 mL), NaHCO<sub>3</sub> (1000 mL) and brine (500 mL), dried over Na<sub>2</sub>SO<sub>4</sub> and concentrated to give the crude product, *tert*-butyl N-(1-allyl-2-oxo-but-3-enyl)carbamate (108.0 g, crude), which was obtained as a yellow oil. The crude product was used without purification. <sup>1</sup>H NMR (400 MHz, CDCl<sub>3</sub>) δ 6.50 (dd, *J* = 10.3, 17.3, 1H), 6.39 (dd, *J* = 1.3,

17.4, 1H), 5.89 (d,  $J = 10.2$ , 1H), 5.66 (tdd,  $J = 7.2$ , 10.7, 16.3, 1H), 5.34 (m, 1H), 5.15 (m, 2H), 4.69 (q,  $J = 6.1$ , 1H), 2.63 (m, 1H), 2.39 (m, 1H), 1.44 (s, 9H).

Step 4: *tert*-butyl *N*-(2-oxocyclopent-3-en-1-yl)carbamate

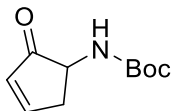

To a stirred solution of *tert*-butyl *N*-(1-allyl-2-oxo-but-3-enyl)carbamate (16.0 g, 71.0 mmol, 1.00 eq) in DCM (500 mL) was added benzylidene-[1,3-bis(2,4,6-trimethylphenyl)imidazolidin-2-ylidene]-dichloro-ruthenium tricyclohexylphosphane (0.7 g) under  $N_2$ . The reaction mixture was stirred at rt for 24 hr, then additional benzylidene-[1,3-bis(2,4,6-trimethylphenyl)imidazolidin-2-ylidene]-dichloro-ruthenium tricyclohexylphosphane (0.15 g) was added. The reaction mixture was stirred for 12 hr, then a third batch of benzylidene-[1,3-bis(2,4,6-trimethylphenyl)imidazolidin-2-ylidene]-dichlororuthenium tricyclohexylphosphane (0.15 g) was added. The reaction mixture was stirred under  $N_2$  at rt for 12 hr. The reaction mixture was then concentrated to give a residue. The residue was purified by silica gel column chromatography (PE:EtOAc = 20:1 to 6:1) to give *tert*-butyl *N*-(2-oxocyclopent-3-en-1-yl)carbamate (26.0 g, 131.8 mmol, 93% yield) as a pale solid.  $^1H$ NMR: (400 MHz,  $CDCl_3$ )  $\delta$  7.62 (t,  $J = 3.2$ , 1H), 6.19 (m, 1H), 5.08 (s, br, 1H), 3.92 (s, br, 1H), 3.12 (d,  $J = 15.2$ , 1H), 2.59 (m, 1H), 1.38 (s, 9H).

Step 5: *tert*-butyl *N*-*tert*-butoxycarbonyl-*N*-(2-oxocyclopent-3-en-1-yl)carbamate

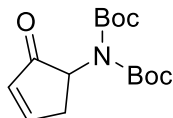

To a solution of *tert*-butyl *N*-(2-oxocyclopent-3-en-1-yl)carbamate (26.0 g, 131.8 mmol, 1.00 eq) in acetonitrile (400 mL) was added DMAP (19.3 g, 158.2 mmol, 1.20 eq) and *tert*-butoxycarbonyl *tert*-butyl carbonate (57.5 g, 263.7 mmol, 60.5 mL, 2.00 eq). The resulting reaction mixture was stirred at rt for 12 hr. The reaction mixture was concentrated to give a residue. The residue was purified by silica gel column chromatography (PE:EtOAc = 30:1 to 10:1) to give *tert*-butyl *N*-*tert*-butoxycarbonyl-*N*-(2-oxocyclopent-3-en-1-yl)carbamate (23.0 g, 77.3 mmol, 58% yield) as a yellow solid.  $^1H$  NMR (400 MHz,  $CDCl_3$ )  $\delta$  = 7.59 (td,  $J = 2.8$ , 6.0, 1H), 6.28 (td,  $J = 2.0$ , 6.2, 1H), 4.77 (dd,  $J = 3.7$ , 7.1, 1H), 3.01 (m, 1H), 2.77 (m, 1H), 1.49 (s, 18H).

Step 6: *tert*-butyl *N*-*tert*-butoxycarbonyl-*N*-[(*rel*-1*S*,3*S*,5*S*)-2-oxo-3-bicyclo[3.1.0]hexanyl]carbamate

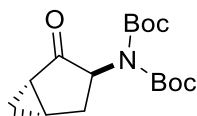

NaH (480 mg, 12.0 mmol, 60% in oil, 2.4 eq) was washed with hexane (3 x 50 mL) and then added into a solution of trimethyloxosulfonium iodide (2.66 g, 12.0 mmol, 2.4 eq) in DMSO (15 mL). The mixture was stirred at rt for 1 hr, then the mixture was added into a solution of *tert*-butyl *N*-*tert*-butoxycarbonyl-*N*-(2-oxocyclopent-3-en-1-yl)carbamate (1.50 g, 5.04 mmol, 1.00 eq) in DMSO (20 mL) at 50 °C. The mixture was stirred at 50 °C for 5 hr. The reaction mixture was diluted with EtOAc (60 mL) and washed with brine (3 x 60 mL). The organic layer was separated and dried over Na<sub>2</sub>SO<sub>4</sub> and concentrated to give a residue. The residue was purified by silica gel column chromatography (PE:EtOAc = 35:1 to 20:1) to give *tert*-butyl *N*-*tert*-butoxycarbonyl-*N*-[(*rel*-1*S*,3*S*,5*S*)-2-oxo-3-bicyclo[3.1.0]hexanyl]carbamate (900 mg, 2.60 mmol, 51% yield, 90% purity) as a white solid. <sup>1</sup>H NMR: (400 MHz, CDCl<sub>3</sub>) δ 4.59 (t, *J* = 8.7, 1H), 2.37 (dd, *J* = 2.8, 8.6, 2H), 2.11 (m, 1H), 1.90 (ddd, *J* = 3.3, 5.1, 9.0, 1H), 1.44 (s, 18H), 1.19 (m, 1H), 0.86 (m, 1H).

Step 7: *rel*-(1*S*,3*S*,5*S*)-3-aminobicyclo[3.1.0]hexan-2-one

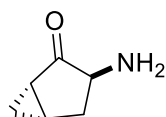

To a solution of *tert*-butyl *N*-*tert*-butoxycarbonyl-*N*-[(*rel*-1*S*,3*S*,5*S*)-2-oxo-3-bicyclo[3.1.0]hexanyl]carbamate (5.70 g, 18.3 mmol, 1.00 eq) in DCM (70 mL) was added TFA (23 g, 202 mmol, 15 mL, 11.0 eq). The reaction mixture was stirred at rt for 6 hr. The reaction mixture was concentrated to give a residue then was washed with MTBE (20 mL) to afford *rel*-(1*S*,3*S*,5*S*)-3-aminobicyclo[3.1.0]hexan-2-one (2.88 g, 66% yield, TFA salt) as a pale yellow solid. <sup>1</sup>H NMR: (400 MHz, CD<sub>3</sub>OD) δ = 3.82 (tdd, *J* = 0.9, 8.5, 9.5, 1H), 2.57 (dd, *J* = 8.3, 12.7, 1H), 2.28 (qd, *J* = 5.2, 7.8, 1H), 2.09 (dddd, *J* = 0.7, 5.2, 9.6, 12.8, 1H), 1.95 (m, 1H), 1.39 (m, 2H).

*rel*-(1*S*,2*S*,3*S*,5*S*)-3-aminobicyclo[3.1.0]hexan-2-ol

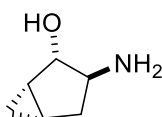

Step 1: *tert*-butyl *N*-[(*rel*-1*S*,3*S*,5*S*)-2-oxo-3-bicyclo[3.1.0]hexanyl]carbamate

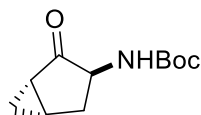

To a solution of *tert*-butyl *N*-*tert*-butoxycarbonyl-*N*-[(*rel*-1*S*,3*S*,5*S*)-2-oxo-3-bicyclo[3.1.0]hexanyl]carbamate (5.0 g, 16.1 mmol, 1.00 eq) in acetonitrile (120 mL) was added NaI (2.41 g, 16.1 mmol, 1.00 eq) at rt, followed by addition of CeCl<sub>3</sub>·7H<sub>2</sub>O (5.98 g, 16.1 mmol, 1.00 eq) in one portion. The suspension was stirred at rt for 12 hr. The suspension was diluted with H<sub>2</sub>O (500 mL), and then extracted with EtOAc (2 x 500 mL). The organic layer was separated, dried over anhydrous Na<sub>2</sub>SO<sub>4</sub>, filtered through a pad of



celite, and the filtrate was concentrated to give crude product. The crude product was purified by silica gel column chromatography (EtOAc:PE = 1:5 to 1:2) to give *tert*-butyl *N*-[*rel*-(1*S*,3*S*,5*S*)-2-oxo-3-bicyclo[3.1.0]hexanyl]carbamate (2.50 g, 66% yield) as a white solid. <sup>1</sup>H NMR (400 MHz, CDCl<sub>3</sub>) δ = 4.83 (s, br, 1H), 3.98 (m, 1H), 2.71 (dd, *J* = 8.1, 12.7, 1H), 2.12 (m, 1H), 1.91 (m, 2H), 1.46 (s, 9H), 1.30 (m, 2H).

Step 2: *tert*-butyl *N*-[*rel*-(1*S*,2*S*,3*S*,5*S*)-2-hydroxy-3-bicyclo[3.1.0]hexanyl]carbamate

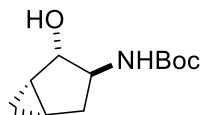

To a solution of *tert*-butyl *N*-[*rel*-(1*S*,3*S*,5*S*)-2-oxo-3-bicyclo[3.1.0]hexanyl]carbamate (2.00 g, 8.5 mmol, 1.00 eq) in absolute EtOH (120 mL) at -78 °C was added Li(OtBu)<sub>3</sub>AlH (4.33 g, 17.0 mmol, 2.00 eq) in small portions. The mixture was allowed to slowly warm to rt and then stirred for 12 hr. The mixture was quenched with H<sub>2</sub>O (600 mL) and filtered through a pad of celite. The filtrate was extracted with EtOAc (2 x 500 mL). The organic layer was separated, dried over anhydrous Na<sub>2</sub>SO<sub>4</sub>, filtered, and concentrated to give crude product. The crude product was purified by silica gel column chromatography (EtOAc:PE = 1:5 to 1:2) to afford *tert*-butyl *N*-[*rel*-(1*S*,2*S*,3*S*,5*S*)-2-hydroxy-3-bicyclo[3.1.0]hexanyl]carbamate (1.30 g, 60% yield, 85% purity) as a white solid. <sup>1</sup>H NMR (400 MHz, CD<sub>3</sub>OD) δ = 4.13 (dd, *J* = 4.9, 7.7, 1H), 3.34 (m, 1H), 2.06 (dd, *J* = 7.7, 12.6, 1H), 1.67 (m, 1H), 1.44 (s, 9H), 1.27 (m, 1H), 0.60 (m, 1H), 0.39 (dt, *J* = 5.6, 7.9, 1H).

Step 3: *rel*-(1*S*,2*S*,3*S*,5*S*)-3-aminobicyclo[3.1.0]hexan-2-ol

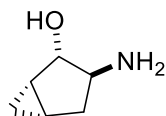

To a round bottom flask charged with HCl in EtOAc (4 M, 42.5 mL, 38.7 eq) was added *tert*-butyl *N*-[*rel*-(1*S*,2*S*,3*S*,5*S*)-2-hydroxy-3-bicyclo[3.1.0]hexanyl]carbamate (1.10 g, 4.38 mmol, 1.0 eq) in portions at 0 °C. The mixture was allowed warm to rt and stirred for 5 hr. A white suspension formed. The reaction was concentrated under vacuum to afford *rel*-(1*S*,2*S*,3*S*,5*S*)-3-aminobicyclo[3.1.0]hexan-2-ol (650 mg, 100% yield, HCl salt) as a white solid. <sup>1</sup>H NMR (400 MHz, CD<sub>3</sub>OD) δ = 4.36 (m, 1H), 2.91 (td, *J* = 7.7, 10.0, 1H), 2.22 (dd, *J* = 7.6, 12.7, 1H), 1.88 (m, 1H), 1.57 (m, 1H), 1.44 (m, 1H), 0.63 (m, 1H), 0.51 (m, 1H).

*rel*-(1*S*,2*R*,3*S*,5*S*)-3-aminobicyclo[3.1.0]hexan-2-ol

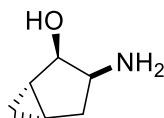

Step 1: *tert*-butyl *N*-*tert*-butoxycarbonyl-*N*-[*rel*-(1*S*,2*R*,3*S*,5*S*)-2-hydroxy-3-bicyclo[3.1.0]hexanyl]carbamate

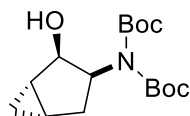

To a stirred solution of *tert*-butyl *N*-*tert*-butoxycarbonyl-*N*-[*rel*-(1*S*,3*S*,5*S*)-2-oxo-3-bicyclo[3.1.0]hexanyl]carbamate (400 mg, 1.28 mmol, 1.0 eq) in THF (3 mL) at -78 °C under N<sub>2</sub> was added LiBH<sub>4</sub> (55 mg, 2.56 mmol, 2.0 eq). The resulting reaction mixture was stirred at -78 °C for 2 hr, then the reaction mixture was allowed to warm to rt and stirred for 10 hr. The reaction mixture was concentrated under reduced pressure. The crude *tert*-butyl *N*-*tert*-butoxycarbonyl-*N*-[*rel*-(1*S*,2*R*,3*S*,5*S*)-2-hydroxy-3-bicyclo[3.1.0]hexanyl]carbamate (440 mg) was isolated as a yellow oil and was used in the next step without further purification.

Step 2: *rel*-(1*S*,2*R*,3*S*,5*S*)-3-aminobicyclo[3.1.0]hexan-2-ol

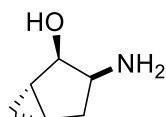

To a solution of *tert*-butyl *N*-*tert*-butoxycarbonyl-*N*-[*rel*-(1*S*,2*R*,3*S*,5*S*)-2-hydroxy-3-bicyclo[3.1.0]hexanyl]carbamate (440 mg, 1.40 mmol, 1.0 eq) in DCM (5 mL) was added TFA (1.60 g, 14.0 mmol, 1.04 mL, 10.0 eq). The resulting mixture was stirred at rt for 5 hr. The mixture was concentrated under reduced pressure to afford the crude product *rel*-(1*S*,2*R*,3*S*,5*S*)-3-aminobicyclo[3.1.0]hexan-2-ol (400 mg, TFA salt) as a brown solid. The material was used without further purification. <sup>1</sup>H NMR (400 MHz, CD<sub>3</sub>OD) δ = 3.89 (m, 1H), 3.70 (m, 1H), 2.19 (m, 1H), 1.87 (m, 1H), 1.57 (m, 1H), 1.44 (m, 1H), 0.51 (m, 1H), 0.29 (m, 1H).

4-(3-bromophenoxy)butanoic acid

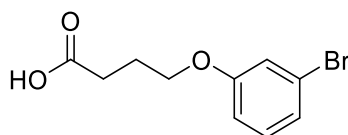

Step 1: ethyl 4-(3-bromophenoxy)butanoate

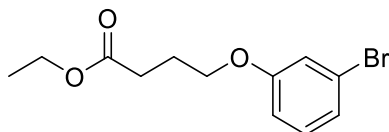

To a solution of 3-bromophenol (5.00 g, 28.90 mmol, 1.00 eq) and ethyl 4-bromobutanoate (6.20 g, 31.79 mmol, 4.56 mL, 1.10 eq) in DMF (70 mL) was added K<sub>2</sub>CO<sub>3</sub> (8.00 g, 57.80 mmol, 2.00 eq). The resulting mixture was stirred at rt for 0.5 hr and then heated to 95 °C for 1 hr. The reaction mixture was then cooled to rt, diluted with H<sub>2</sub>O (300 mL) and extracted with DCM (3 x 200 mL). The combined organic layers were dried over Na<sub>2</sub>SO<sub>4</sub>, filtered and concentrated under reduced pressure to give a residue,

which was purified by silica gel column chromatography (PE:EtOAc = 100:1 to 20:1) to give ethyl 4-(3-bromophenoxy)butanoate (6.40 g, 77% yield) as a yellow oil.  $^1\text{H NMR}$  (400 MHz,  $\text{CDCl}_3$ )  $\delta$  = 7.09 (m, 3H), 6.83 (d,  $J$  = 8.4, 1H), 4.16 (q,  $J$  = 7.1, 2H), 4.00 (t,  $J$  = 6.2, 2H), 2.51 (t,  $J$  = 7.3, 2H), 2.11 (m, 2H), 1.26 (t,  $J$  = 8.0, 3H); LCMS calculated for  $\text{C}_{12}\text{H}_{15}\text{BrO}_3$ :  $m/z$  = 286; found:  $m/z$  = 287 (M+H).

Step 2: 4-(3-bromophenoxy)butanoic acid

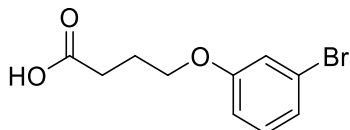

To a solution of ethyl 4-(3-bromophenoxy)butanoate (6.40 g, 22.26 mmol, 1.00 eq) in THF (40 mL) and  $\text{H}_2\text{O}$  (40 mL) was added  $\text{LiOH}\cdot\text{H}_2\text{O}$  (1.87 g, 44.52 mmol, 2.00 eq). The resulting mixture was heated to 50 °C and stirred for 3 hr under  $\text{N}_2$  atmosphere. The reaction mixture was cooled to rt and concentrated under reduced pressure to give a residue. The residue was diluted with  $\text{H}_2\text{O}$  (200 mL) and extracted with DCM (3 x 200 mL). The organic layers were discarded.  $\text{HCl}$  (3M) was added to the aqueous phase to adjust to pH = 2 and the mixture was extracted with DCM (3 x 200 mL). The combined organic layers were dried over  $\text{Na}_2\text{SO}_4$ , filtered, and concentrated under reduced pressure to afford 4-(3-bromophenoxy)butanoic acid (5.22 g) as a white solid.  $^1\text{H NMR}$  (400 MHz,  $\text{CD}_3\text{OD}$ )  $\delta$  = 7.16 (dd,  $J$  = 8.0, 8.0, 1H), 7.07 (m, 2H), 6.88 (dd,  $J$  = 2.3, 8.0, 1H), 4.00 (t,  $J$  = 6.3, 2H), 2.48 (t,  $J$  = 7.4, 2H), 2.05 (m, 2H); LCMS calculated for  $\text{C}_{10}\text{H}_{11}\text{BrO}_3$ :  $m/z$  = 258; found:  $m/z$  = 259 (M+H).

4-(3-(methylsulfonyl)phenoxy)butanoic acid

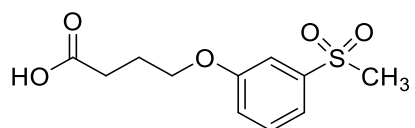

Step 1: ethyl 4-(3-(methylthio)phenoxy)butanoate

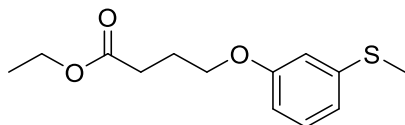

To a solution of 3-(methylthio)phenol (5.00 g, 35.66 mmol, 1.00 eq) in DMF (20 mL) was added  $\text{K}_2\text{CO}_3$  (14.79 g, 106.98 mmol, 3.00 eq), KI (592 mg, 3.57 mmol, 0.10 eq) and ethyl 4-bromobutanoate (8.35 g, 42.79 mmol, 6.14 mL, 1.20 eq). The resulting reaction mixture was then heated to 100 °C and stirred for 12 hr. The reaction mixture was cooled to rt and quenched by adding  $\text{H}_2\text{O}$  (30 mL) then transferred to a separatory funnel and extracted with EtOAc (3 x 50 mL). The combined organic layers were dried over  $\text{Na}_2\text{SO}_4$ , filtered, and concentrated under reduced pressure to give a residue. The residue was purified by silica gel column chromatography (PE:EtOAc = 100:1 to 50:1) to

give ethyl 4-(3-(methylthio)phenoxy)butanoate (6.00 g, 62% yield) as a colorless oil.  $^1\text{H}$  NMR (400 MHz,  $\text{CDCl}_3$ )  $\delta$  = 7.18 (dt,  $J$  = 3.0, 8.0, 1H), 6.87 - 6.77 (m, 2H), 6.66 (dd,  $J$  = 2.1, 8.3, 1H), 4.15 (q,  $J$  = 7.1, 2H), 4.00 (dt,  $J$  = 2.8, 6.1, 2H), 2.59 - 2.40 (m, 5H), 2.11 (m, 2H), 1.26 (t,  $J$  = 7.2, 3H); LCMS calculated for  $\text{C}_{13}\text{H}_{18}\text{O}_3\text{S}$ :  $m/z$  = 254; found:  $m/z$  = 255 (M+H).

Step 2: ethyl 4-(3-(methylsulfonyl)phenoxy)butanoate

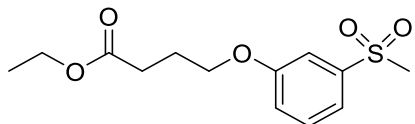

To a solution of ethyl 4-(3-(methylthio)phenoxy)butanoate (500 mg, 1.84 mmol, 1.00 eq) in  $\text{CHCl}_3$  (10 mL) at 0 °C was added *m*-CPBA (2.27 g, 9.19 mmol, 70% purity, 5.00 eq), and the resulting reaction mixture was warmed to rt and stirred for 5 hr. The reaction was quenched with saturated  $\text{Na}_2\text{S}_2\text{O}_3$  solution (50 mL) and the resulting mixture was extracted with EtOAc (2 x 50 mL). The combined organic phases were then washed with saturated  $\text{NaHCO}_3$  (20 mL) and brine (20 mL), dried over  $\text{Na}_2\text{SO}_4$ , filtered, and evaporated under reduced pressure. The residue was purified by silica gel column chromatography (PE:EtOAc = 20:1-1:1) to give ethyl 4-(3-(methylsulfonyl)phenoxy)butanoate (490 mg, 86% yield) as a colorless oil.  $^1\text{H}$  NMR (400 MHz,  $\text{CDCl}_3$ )  $\delta$  = 7.47 (m, 3H), 7.16 (dd,  $J$  = 1.3, 8.0, 1H), 4.16 (q,  $J$  = 7.1, 2H), 4.08 (t,  $J$  = 6.1, 2H), 3.05 (s, 3H), 2.52 (t,  $J$  = 7.2, 2H), 2.14 (m, 2H), 1.27 (t,  $J$  = 7.2, 3H); LCMS calculated for  $\text{C}_{13}\text{H}_{18}\text{O}_5\text{S}$ :  $m/z$  = 286; found:  $m/z$  = 287 (M+H).

Step 3: 4-(3-(methylsulfonyl)phenoxy)butanoic acid

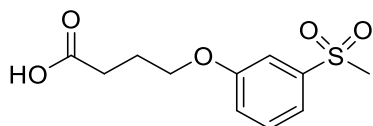

To a solution of ethyl 4-(3-(methylsulfonyl)phenoxy)butanoate (490 mg, 1.58 mmol, 1.00 eq) in THF (5 mL) /  $\text{H}_2\text{O}$  (1 mL) was added  $\text{LiOH}\cdot\text{H}_2\text{O}$  (199 mg, 4.74 mmol, 3.00 eq). The resulting reaction mixture was stirred at rt for 12 hr. The reaction mixture was diluted with  $\text{H}_2\text{O}$  (5 mL), then extracted with EtOAc (10 mL) (discarded). The aqueous phase was acidified with citric acid to pH=4 and extracted with EtOAc (2 x 10 mL). The combined organic layers were dried over  $\text{Na}_2\text{SO}_4$ , filtered, and concentrated under reduced pressure to give 4-(3-(methylsulfonyl)phenoxy)butanoic acid (360 mg, 88% yield) as a white solid which was used without further purification.  $^1\text{H}$  NMR (400 MHz,  $\text{CD}_3\text{OD}$ )  $\delta$  = 7.55-7.45 (m, 3H), 7.26 (m, 1H), 4.12 (t,  $J$  = 6.2, 2H), 3.12 (s, 3H), 2.51 (t,  $J$  = 7.3, 2H), 2.11 (m, 2H); LCMS calculated for  $\text{C}_{11}\text{H}_{14}\text{O}_5\text{S}$ :  $m/z$  = 258; found:  $m/z$  = 259 (M+H).

4-(3-bromophenoxy)-*N*-(*rel*-(1*S*,3*S*,5*S*)-2-oxobicyclo[3.1.0]hexan-3-yl)butanamide (BB0020)

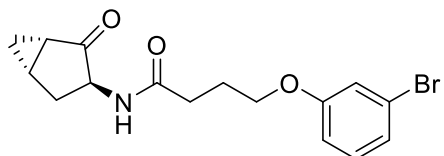

To a solution of 4-(3-bromophenoxy)butanoic acid (300 mg, 1.16 mmol, 1.00 eq) and DMF (58  $\mu$ L, 4.46  $\mu$ L, 0.05 eq) in DCM (7 mL) was added oxalyl chloride (147 mg, 1.16 mmol, 100  $\mu$ L, 1.00 eq) in DCM (3 mL). The reaction mixture was stirred at rt for 0.5 hr. Then the reaction mixture was added into a suspension of *rel*-(1*S*,3*S*,5*S*)-3-aminobicyclo[3.1.0]hexan-2-one (129 mg, 1.16 mmol, 1.00 eq, TFA salt) in DCM (7 mL). Next, DIPEA (525 mg, 4.06 mmol, 710  $\mu$ L, 3.50 eq) in DCM (3 mL) was added. The resulting reaction mixture was stirred at 25 °C for 2.5 hr. The reaction mixture was concentrated to give a residue which was purified by silica gel column chromatography (DCM: MeOH = 600:1) followed by recrystallization from hot EtOAc:PE 1:20 to give 220 mg of 4-(3-bromophenoxy)-*N*-(*rel*-(1*S*,3*S*,5*S*)-2-oxo-3-bicyclo[3.1.0]hexanyl)butanamide (54% yield) as a white solid (97% pure by HPLC-UV). <sup>1</sup>H NMR (400 MHz, CD<sub>3</sub>OD)  $\delta$  = 7.16 (m, 1H), 7.07 (m, 2H), 6.90 (dd, *J* = 1.2, 8.4, 1H), 4.26 (t, *J* = 9.2, 1H), 4.00 (t, *J* = 6.2, 2H), 2.41 (m, 3H), 2.16 - 1.96 (m, 4H), 1.83 (ddd, *J* = 3.6, 5.1, 8.7, 1H), 1.29 (m, 2H); LCMS calculated for C<sub>16</sub>H<sub>18</sub>BrNO<sub>3</sub>: *m/z* = 351; found: *m/z* = 352 (M+H).

4-(3-(methylsulfonyl)phenoxy)-*N*-(*rel*-(1*S*,3*S*,5*S*)-2-oxobicyclo[3.1.0]hexan-3-yl)butanamide (BB0126)

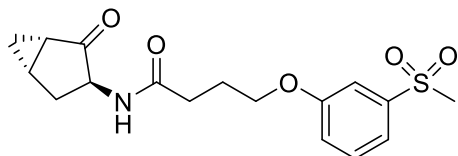

To a solution of 4-(3-(methylsulfonyl)phenoxy)butanoic acid (100 mg, 387  $\mu$ mol, 1.00 eq) in THF (3 mL) at 0 °C under N<sub>2</sub> atmosphere was added isopropyl chloroformate (47 mg, 387  $\mu$ mol, 54  $\mu$ L, 1.00 eq) and Et<sub>3</sub>N (78 mg, 774  $\mu$ mol, 107  $\mu$ L, 2.00 eq). The resulting reaction mixture was stirred at 0 °C for 1 hr. Then the mixture was added to a solution of *rel*-(1*S*,3*S*,5*S*)-3-aminobicyclo[3.1.0]hexan-2-one (87 mg, 387  $\mu$ mol, 1.00 eq, TFA salt) in THF (2 mL). The resulting reaction mixture was stirred at rt for 1 hr. The reaction mixture was diluted with NaHCO<sub>3</sub> (5 mL) and extracted with EtOAc (2 x 10 mL). The combined organic layers were then washed with brine (5 mL), dried over Na<sub>2</sub>SO<sub>4</sub>, filtered, and concentrated under reduced pressure to give a residue. The residue was purified by reverse-phase HPLC (C<sub>18</sub> column, 20-80% MeOH in H<sub>2</sub>O) to give 4-(3-(methylsulfonyl)phenoxy)-*N*-(*rel*-(1*S*,3*S*,5*S*)-2-oxobicyclo[3.1.0]hexan-3-yl)butanamide (50 mg, 37% yield) as a white gum (100% pure by HPLC-UV). <sup>1</sup>H NMR (400 MHz, CD<sub>3</sub>OD)  $\delta$  = 7.51 (m, 2H), 7.47 (dd, *J* = 1.6, 2.0, 1H), 7.27 (td, *J* = 2.2, 7.5, 1H), 4.27 (m, 1H), 4.12 (t, *J* = 6.3, 2H), 3.12 (s, 3H), 2.44 (m, 3H), 2.11 (m, 3H), 2.00 (m, 1H), 1.83 (m, 1H), 1.32 (m, 2H); LCMS calculated for C<sub>17</sub>H<sub>21</sub>NO<sub>5</sub>S: *m/z* = 351; found: *m/z* = 352 (M+H).

(S)-4-(3-(methylsulfonyl)phenoxy)-N-(2-oxotetrahydrothiophen-3-yl)butanamide  
(BB0221)

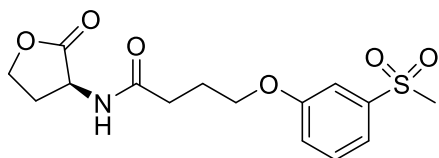

To a solution of 4-(3-methylsulfonylphenoxy)butanoic acid (0.15 g, 580  $\mu\text{mol}$ , 1.0 eq) in THF (1 mL) was added isopropyl carbonochloridate (71 mg, 580  $\mu\text{mol}$ , 81  $\mu\text{L}$ , 1.0 eq) and  $\text{Et}_3\text{N}$  (118 mg, 1.16 mmol, 162  $\mu\text{L}$ , 2.0 eq) at 0  $^\circ\text{C}$  under  $\text{N}_2$  atmosphere. The resulting reaction mixture was stirred at 0  $^\circ\text{C}$  for 1 hr, then the mixture was added to the solution of (S)-3-aminotetrahydrofuran-2-one (59 mg, 580  $\mu\text{mol}$ , 1.0 eq, HBr salt) in THF (1 mL). The resulting reaction mixture was stirred at rt for 1 hr. The reaction mixture was diluted with  $\text{NaHCO}_3$  (20 mL), and then extracted with  $\text{EtOAc}$  (3 x 15 mL). The combined organic layers were washed with brine (10 mL) dried over  $\text{Na}_2\text{SO}_4$ , filtered, and concentrated under reduced pressure to give a residue. The residue was purified by silica gel column chromatography ( $\text{CH}_3\text{CN}:\text{EtOAc} = 1:20$ ) to give (S)-4-(3-(methylsulfonyl)phenoxy)-N-(2-oxotetrahydrothiophen-3-yl)butanamide (160 mg, 81% yield) as a white solid (99% pure by HPLC-UV).  $^1\text{H NMR}$  (400 MHz,  $\text{DMSO-d}_6$ )  $\delta = 8.44$  (d, br,  $J = 7.7$ , 1H), 7.56 (m, 1H), 7.48 (m, 1H), 7.41 (m, 1H), 7.29 (d, br,  $J = 6.7$ , 1H), 4.54 (m, 1H), 4.34 (m, 1H), 4.21 (m, 1H), 4.08 (m, 2H), 3.22 (s, 3H), 2.41 - 2.28 (m, 3H), 2.15 (m, 1H), 1.97 (m, 2H); LCMS calculated for  $\text{C}_{15}\text{H}_{19}\text{NO}_6\text{S}$ :  $m/z = 341$ ; found:  $m/z = 342$  (M+H).

N-(rel-(1S,3S,5S)-2-oxobicyclo[3.1.0]hexan-3-yl)dodecanamide (BB0231)

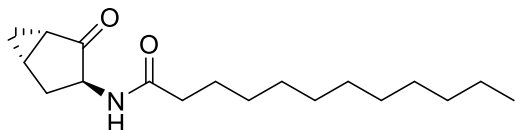

To a solution of *rel*-(1S,3S,5S)-3-aminobicyclo[3.1.0]hexan-2-one (206 mg, 914  $\mu\text{mol}$ , 1.0 eq, TFA salt) in DCM (10 mL) at 0  $^\circ\text{C}$  under  $\text{N}_2$  was added  $\text{Et}_3\text{N}$  (185 mg, 1.83 mmol, 255  $\mu\text{L}$ , 2.0 eq). After stirring for 5 min, dodecanoyl chloride (0.2 g, 914  $\mu\text{mol}$ , 211  $\mu\text{L}$ , 1.0 eq) was added dropwise to the reaction mixture. The resulting reaction mixture was warmed to rt and stirred for 4 hr. The reaction mixture was diluted with  $\text{H}_2\text{O}$  (20 mL) and extracted with DCM (3 x 20 mL). The combined organic layers were dried over  $\text{Na}_2\text{SO}_4$ , filtered, and concentrated under reduced pressure to give a residue. The residue was purified by preparative TLC ( $\text{SiO}_2$ ,  $\text{DCM}:\text{MeOH} = 15:1$ ) to give N-(*rel*-(1S,3S,5S)-2-oxobicyclo[3.1.0]hexan-3-yl)dodecanamide (123 mg, 46% yield) as a white solid (100% pure by HPLC-ELSD).  $^1\text{H NMR}$  (400 MHz,  $\text{CDCl}_3$ )  $\delta = 5.73$  (s, br, 1H), 4.15 (m, 1H), 2.80 (dd,  $J = 8.1, 12.9$ , 1H), 2.21 (t,  $J = 7.5$ , 2H), 2.13 (m, 1H), 1.92-1.77 (m, 2H), 1.61 (m, 2H), 1.33-1.22 (m, 18H), 0.88 (t,  $J = 6.8$ , 3H); LCMS calculated for  $\text{C}_{18}\text{H}_{31}\text{NO}_2$ :  $m/z = 293$ ; found:  $m/z = 294$  (M+H).

*N*-(*rel*-(1*S*,2*S*,3*S*,5*S*)-2-hydroxybicyclo[3.1.0]hexan-3-yl)dodecanamide (BB0232)

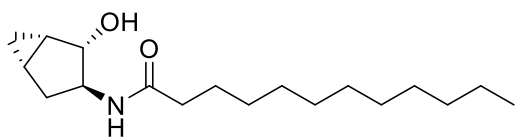

To a solution of *rel*-(1*S*,2*S*,3*S*,5*S*)-3-aminobicyclo[3.1.0]hexan-2-ol (120 mg, 802  $\mu$ mol, 1.0 eq, HCl salt) and Et<sub>3</sub>N (162 mg, 1.60 mmol, 223  $\mu$ L, 2.0 eq) in DCM (2 mL) at 0°C was added dodecanoyl chloride (175 mg, 802  $\mu$ mol, 185  $\mu$ L, 1.0 eq). The resulting reaction mixture was warmed to rt and stirred for 3 hr. The reaction mixture was diluted with 2M HCl (20 mL) and extracted with DCM (3 x 15 mL). The combined organic layers were dried over Na<sub>2</sub>SO<sub>4</sub>, filtered, and concentrated under reduced pressure to give a residue. The residue was purified by preparative TLC (SiO<sub>2</sub>, DCM:MeOH = 15:1) to give *N*-(*rel*-(1*S*,2*S*,3*S*,5*S*)-2-hydroxybicyclo[3.1.0]hexan-3-yl)dodecanamide (47 mg, 20% yield) as a white solid (100% pure by HPLC-ELSD). <sup>1</sup>H NMR (400 MHz, CDCl<sub>3</sub>)  $\delta$  = 5.46 (s, br, 1H), 4.78 (s, 1H), 4.24 (t, *J* = 5.7, 1H), 3.57 (m, 1H), 2.25 (dd, *J* = 7.9, 12.0, 1H), 2.18 (t, *J* = 7.6, 3H), 1.65 (m, 1H), 1.59 (m, 4H), 1.33-1.24 (m, 16H), 0.89 (t, *J* = 6.8, 3H), 0.68 (m, 1H), 0.51 (m, 1H); LCMS calculated for C<sub>18</sub>H<sub>33</sub>NO<sub>2</sub>: *m/z* = 295; found: *m/z* = 296 (M+H).

*N*-(*rel*-(1*S*,2*R*,3*S*,5*S*)-2-hydroxybicyclo[3.1.0]hexan-3-yl)dodecanamide (BB0233)

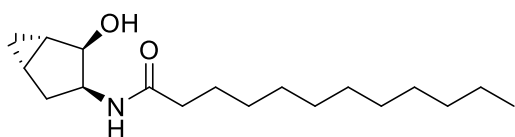

To a solution of *rel*-(1*S*,2*R*,3*S*,5*S*)-3-aminobicyclo[3.1.0]hexan-2-ol (450 mg, 1.98 mmol, 1.5 eq, TFA salt) and Et<sub>3</sub>N (267 mg, 2.64 mmol, 368  $\mu$ L, 2.0 eq) in DCM (10 mL) at 0°C was added dodecanoyl chloride (289 mg, 1.32 mmol, 305  $\mu$ L, 1.0 eq). The resulting reaction mixture was warmed to rt and stirred for 3 hr. The reaction mixture was diluted with 2M HCl (20 mL) and extracted with DCM (3 x 15 mL). The combined organic layers were dried over Na<sub>2</sub>SO<sub>4</sub>, filtered, and concentrated under reduced pressure to give a residue. The residue was purified by silica gel column chromatography (PE:EtOAc = 20:1 to 3:1). The resulting solid obtained after evaporation of solvents was washed with *n*-hexane (50 mL) and filtered. The filter cake was dried under reduced pressure to give *N*-(*rel*-(1*S*,2*R*,3*S*,5*S*)-2-hydroxybicyclo[3.1.0]hexan-3-yl)dodecanamide (220 mg, 56% yield) as a white solid (100% pure by HPLC-ELSD). <sup>1</sup>H NMR (400 MHz, CDCl<sub>3</sub>)  $\delta$  = 5.91 (d, br, *J* = 7.5, 1H), 4.07 (d, *J* = 4.4, 1H), 3.92 (m, 1H), 2.16 (m, 3H), 1.94 (s, br, 1H), 1.61 (m, 3H), 1.43 (m, 2H), 1.34-1.21 (m, 16H), 0.88 (t, *J* = 6.7, 3H), 0.52 (m, 1H), 0.37 (m, 1H); LCMS calculated for C<sub>18</sub>H<sub>33</sub>NO<sub>2</sub>: *m/z* = 295; found: *m/z* = 296 (M+H).

*N*-(*rel*-(1*S*,2*S*,3*S*,5*S*)-2-hydroxybicyclo[3.1.0]hexan-3-yl)-4-(3-(methylsulfonyl)phenoxy)butanamide (BB0272)

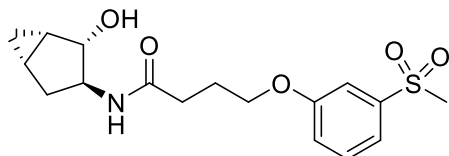

To a solution of 4-(3-methylsulfonylphenoxy)butanoic acid (20 mg, 77.4  $\mu\text{mol}$ , 1.0 eq) in DMF (0.5 mL) at rt was added *rel*-(1*S*,2*S*,3*S*,5*S*)-3-aminobicyclo[3.1.0]hexan-2-ol (12 mg, 77.4  $\mu\text{mol}$ , 1.0 eq, HCl salt), HOBt (17 mg, 116.2  $\mu\text{mol}$ , 1.5 eq), DIPEA (30 mg, 232.3  $\mu\text{mol}$ , 46  $\mu\text{L}$ , 3.0 eq) and EDCI (22 mg, 116.2  $\mu\text{mol}$ , 1.5 eq). The resulting reaction mixture was stirred at rt for 5 hr. The reaction mixture was diluted with brine (15 mL) extracted with EtOAc (3 x 15 mL). The combined organic layers were dried over  $\text{Na}_2\text{SO}_4$ , filtered, and concentrated under reduced pressure to give a residue. The residue was purified by silica gel column chromatography (DCM:MeOH = 100:1 to 30:1) to give *N*-(*rel*-(1*S*,2*S*,3*S*,5*S*)-2-hydroxybicyclo[3.1.0]hexan-3-yl)-4-(3-(methylsulfonyl)phenoxy)butanamide (19 mg, 66% yield) as a white solid (99% pure by HPLC-UV).  $^1\text{H}$  NMR (400 MHz,  $\text{CDCl}_3$ )  $\delta$  = 7.56-7.42 (m, 3H), 7.17 (dd,  $J$  = 1.3, 8.0, 1H), 5.57 (s, br, 1H), 4.53 (s, 1H), 4.23 (t,  $J$  = 5.5, 1H), 4.08 (t,  $J$  = 6.2, 2H), 3.58 (m, 1H), 3.07 (s, 3H), 2.41 (t,  $J$  = 7.2, 2H), 2.23 (m, 1H), 2.13 (m, 2H), 1.72 (m, 1H), 1.60 (m, 1H), 1.37 (m, 1H), 0.68 (m, 1H), 0.50 (m, 1H); LCMS calculated for  $\text{C}_{17}\text{H}_{23}\text{NO}_5\text{S}$ :  $m/z$  = 353; found:  $m/z$  = 354 (M+H).

*N*-(*rel*-(1*S*,2*R*,3*S*,5*S*)-2-hydroxybicyclo[3.1.0]hexan-3-yl)-4-(3-(methylsulfonyl)phenoxy)butanamide (BB0273)

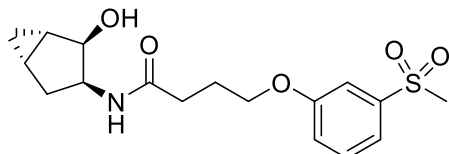

To a solution of 4-(3-methylsulfonylphenoxy)butanoic acid (300 mg, 1.16 mmol, 1.0 eq) in DMF (2 mL) at rt was added *rel*-(1*S*,2*R*,3*S*,5*S*)-3-aminobicyclo[3.1.0]hexan-2-ol (317 mg, 1.39 mmol, 1.2 eq, HCl salt), HOBt (235 mg, 1.74 mmol, 1.5 eq), DIPEA (450 mg, 3.48 mmol, 607  $\mu\text{L}$ , 3.0 eq) and EDCI (334 mg, 1.74 mmol, 1.5 eq). The resulting reaction mixture was stirred at rt for 12 hr. The reaction mixture was diluted with brine (15 mL) extracted with EtOAc (3 x 15 mL). The combined organic layers were dried over  $\text{Na}_2\text{SO}_4$ , filtered, and concentrated under reduced pressure to give a residue. The residue was purified by silica gel column chromatography (DCM:MeOH = 100:1 to 30:1) to give a product, which was further purified by recrystallization from hot DCM/PE (5mL / 40mL). The material was isolated by filtration and the filter cake was dried under high vacuum to give *N*-(*rel*-(1*S*,2*R*,3*S*,5*S*)-2-hydroxybicyclo[3.1.0]hexan-3-yl)-4-(3-(methylsulfonyl)phenoxy)butanamide (158 mg, 38% yield) as a white solid (99% pure by HPLC-UV).  $^1\text{H}$  NMR (400 MHz,  $\text{CDCl}_3$ )  $\delta$  = 7.58-7.38 (m, 3H), 7.17 (dd,  $J$  = 1.3, 8.0, 1H), 5.97 (d, br,  $J$  = 7.8, 1H), 4.07 (m, 3H), 3.94 (m, 1H), 3.06 (s, 3H), 2.40 (t,  $J$  = 7.2, 2H), 2.16 (m, 3H), 1.80 (d,  $J$  = 5.6, 1H), 1.56 (m, 1H), 1.42 (m, 2H), 0.54 (m, 1H), 0.36 (m, 1H); LCMS calculated for  $\text{C}_{17}\text{H}_{23}\text{NO}_5\text{S}$ :  $m/z$  = 353; found:  $m/z$  = 354 (M+H).



# Copies of Analytical Data for New Compounds

BB0020:

Compound ID: BB0020

ET8685-239-P1AA CDCI3 Bruker\_B\_400MHz

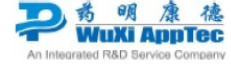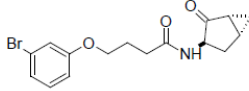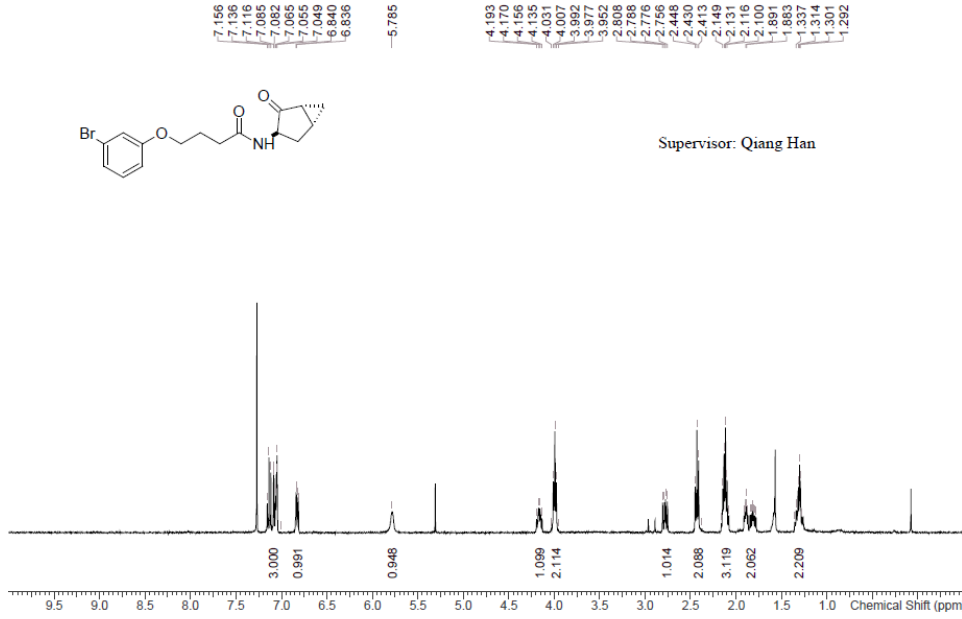

Acquisition Time (sec) 1.9923  
Comment ET8685-23  
9-P1AA  
CDCI3  
Bruker\_B\_  
400MHz  
Date 25 May  
2016  
23:42:24  
Frequency (MHz) 400.1300  
Nucleus 1H  
Number of Transients 4  
Origin Spect  
Original Points Count 16384  
Owner nmr  
Points Count 65536  
Pulse Sequence zg30  
Receiver Gain 199.37  
SW(cyclical) (Hz) 8223.68  
Solvent CHLORO  
FORM-d  
Spectrum Offset (Hz) 2464.0310  
Spectrum Type standard  
Sweep Width (Hz) 8223.56  
Temperature (degree C) 25.204

Supervisor: Qiang Han

Confidential. For research only Not for regulatory filing

Operator:

Date:

LCMS REPORT

Compound ID : BB0020  
Sample ID : ET8685-239-PIA1  
Injection Date : 26. May. 2016  
Inj. Vol. : 0.5 ul  
Location : P1-B-05  
Acq Method : D:\DATA\160526S1\WUXIAB10.M  
Data Filename : D:\DATA\160526S1\1BE-2801.D  
Instrument : S

->

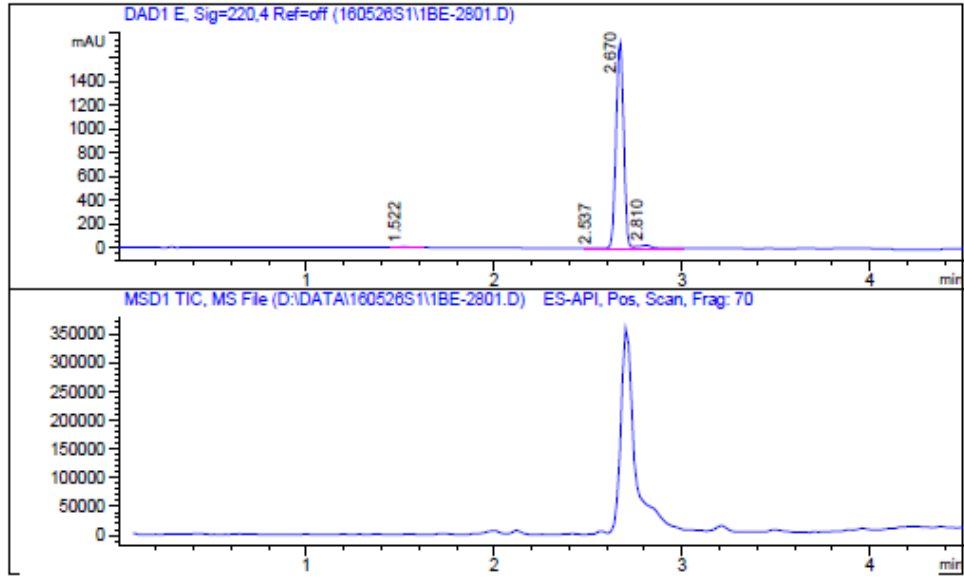

Integration Result

Signal 1 : DAD1 E, Sig=220,4 Ref=off

| Peak # | RT [min] | Area     | Height   | Height % | Width [min] | Area % |
|--------|----------|----------|----------|----------|-------------|--------|
| 1      | 1.522    | 14.303   | 3.994    | 0.226    | 0.056       | 0.282  |
| 2      | 2.537    | 4.746    | 1.899    | 0.108    | 0.043       | 0.094  |
| 3      | 2.670    | 4910.489 | 1731.674 | 98.091   | 0.045       | 96.822 |
| 4      | 2.810    | 142.151  | 27.813   | 1.575    | 0.072       | 2.803  |

Operator: \_\_\_\_\_

Date: \_\_\_\_\_

Confidential. For research only NOT for regulatory filing

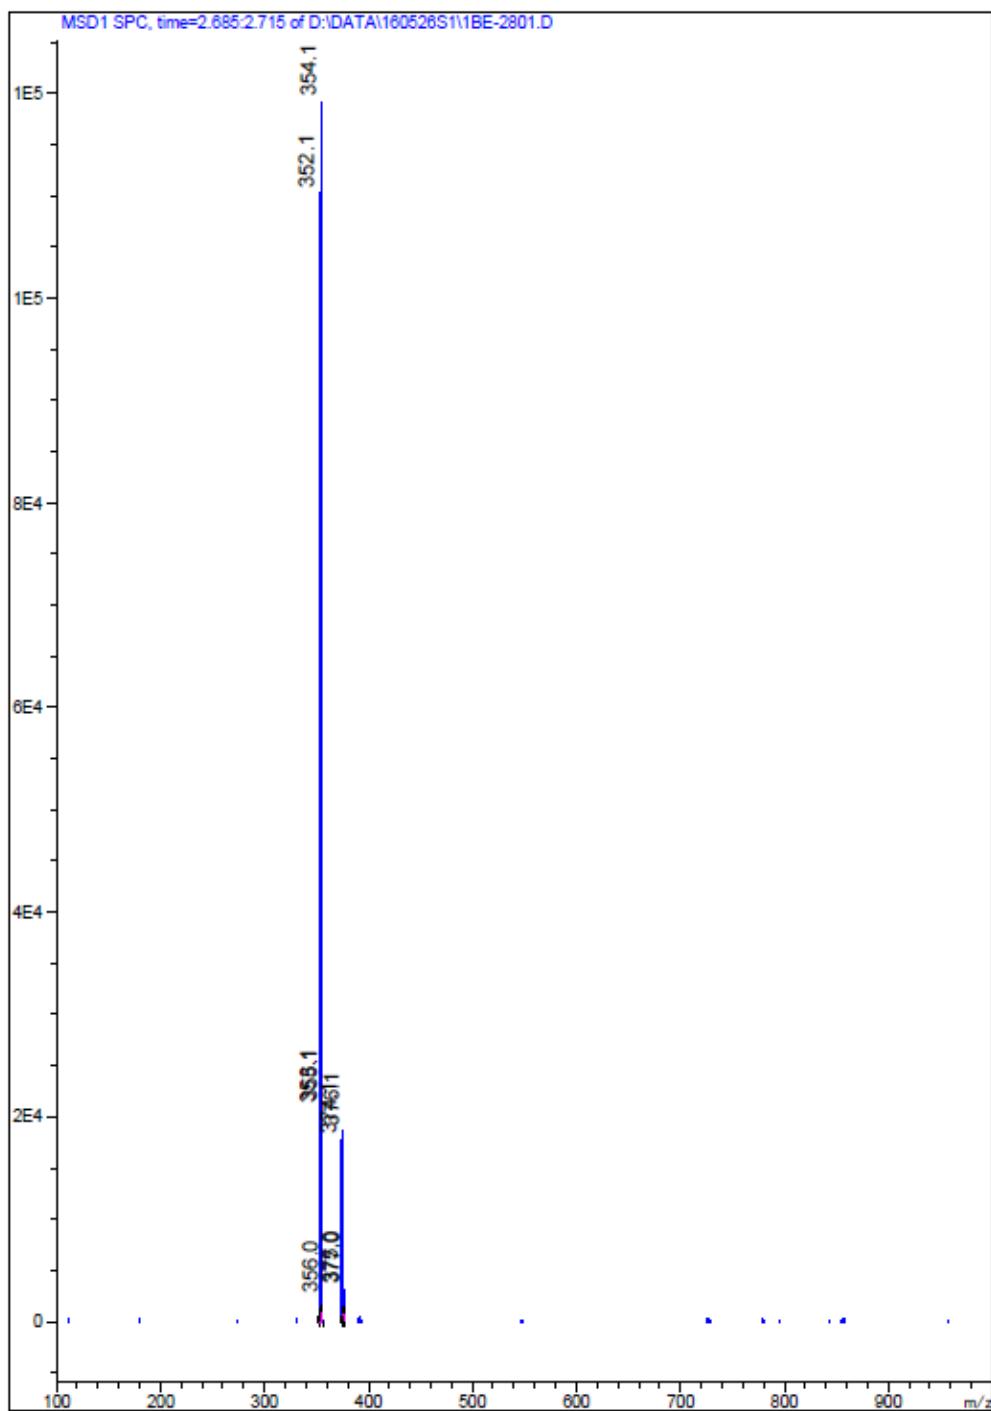

BB0126:

Compound ID: BB0126

ET9659-164-p1m MeOD Varian\_D\_400MHz

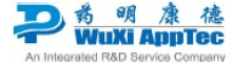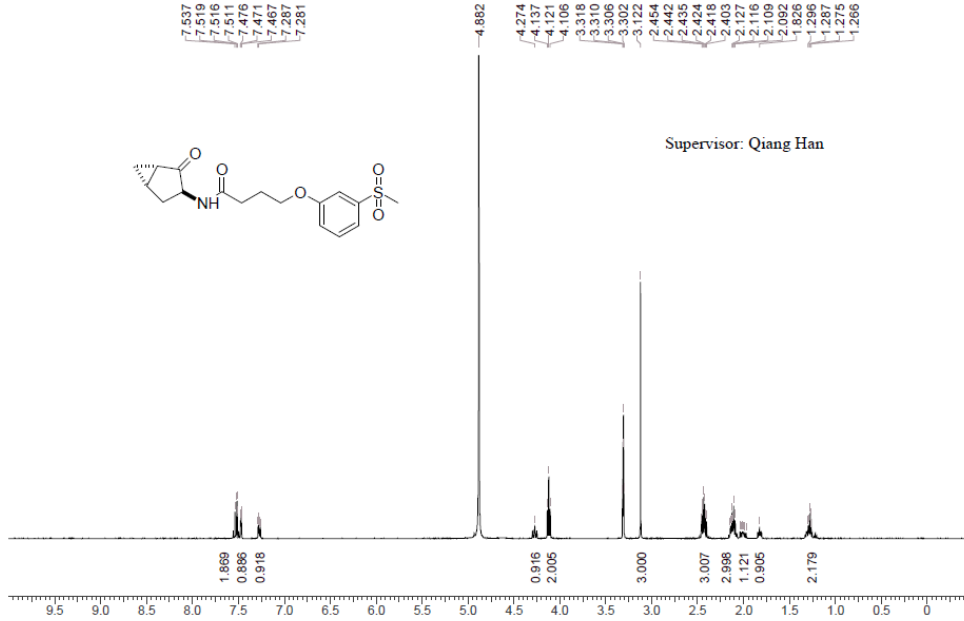

Supervisor: Qiang Han

Acquisition Time (sec) 2.0486  
Comment ET9659-16  
4-p1m  
MeOD  
Varian\_D\_400MHz  
Date Jun 7 2016  
Frequency (MHz) 399.5557  
Nucleus 1H  
Number of Transients 8  
Original Points Count 14802  
Points Count 32768  
Pulse Sequence s2pul  
Receiver Gain 34.00  
SW(cyclical) (Hz) 7225.43  
Solvent METHAN OL-d4  
Spectrum Offset (Hz) 2799.3481  
Spectrum Type standard  
Sweep Width (Hz) 7225.21  
Temperature (degree C) AMBIENT  
TEMPERATURE

Confidential. For research only Not for regulatory filing

Operator:

Date:

LCMS REPORT

Compound ID : BB0126  
Sample ID : ET9659-164-plk  
Injection Date : 7. Jun. 2016  
Inj. Vol. : 1.00 ul  
Location : P1-D-01  
Acq Method : D:\DATA\160607BD 1\WUXIAB01\_W.M  
Data Filename : D:\DATA\160607BD 1\IDA-0201.D  
Instrument : B

->

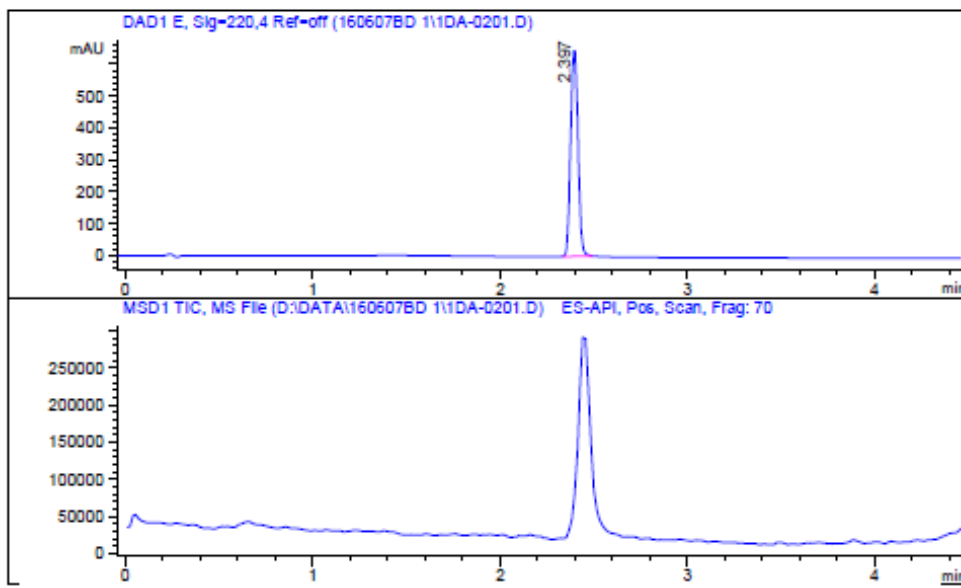

Integration Result

Signal 1 : DAD1 E, Sig=220,4 Ref=off

| Peak # | RT [min] | Area     | Height  | Height % | Width [min] | Area %  |
|--------|----------|----------|---------|----------|-------------|---------|
| 1      | 2.397    | 1792.036 | 655.857 | 100.000  | 0.046       | 100.000 |

Operator: \_\_\_\_\_

Date: \_\_\_\_\_

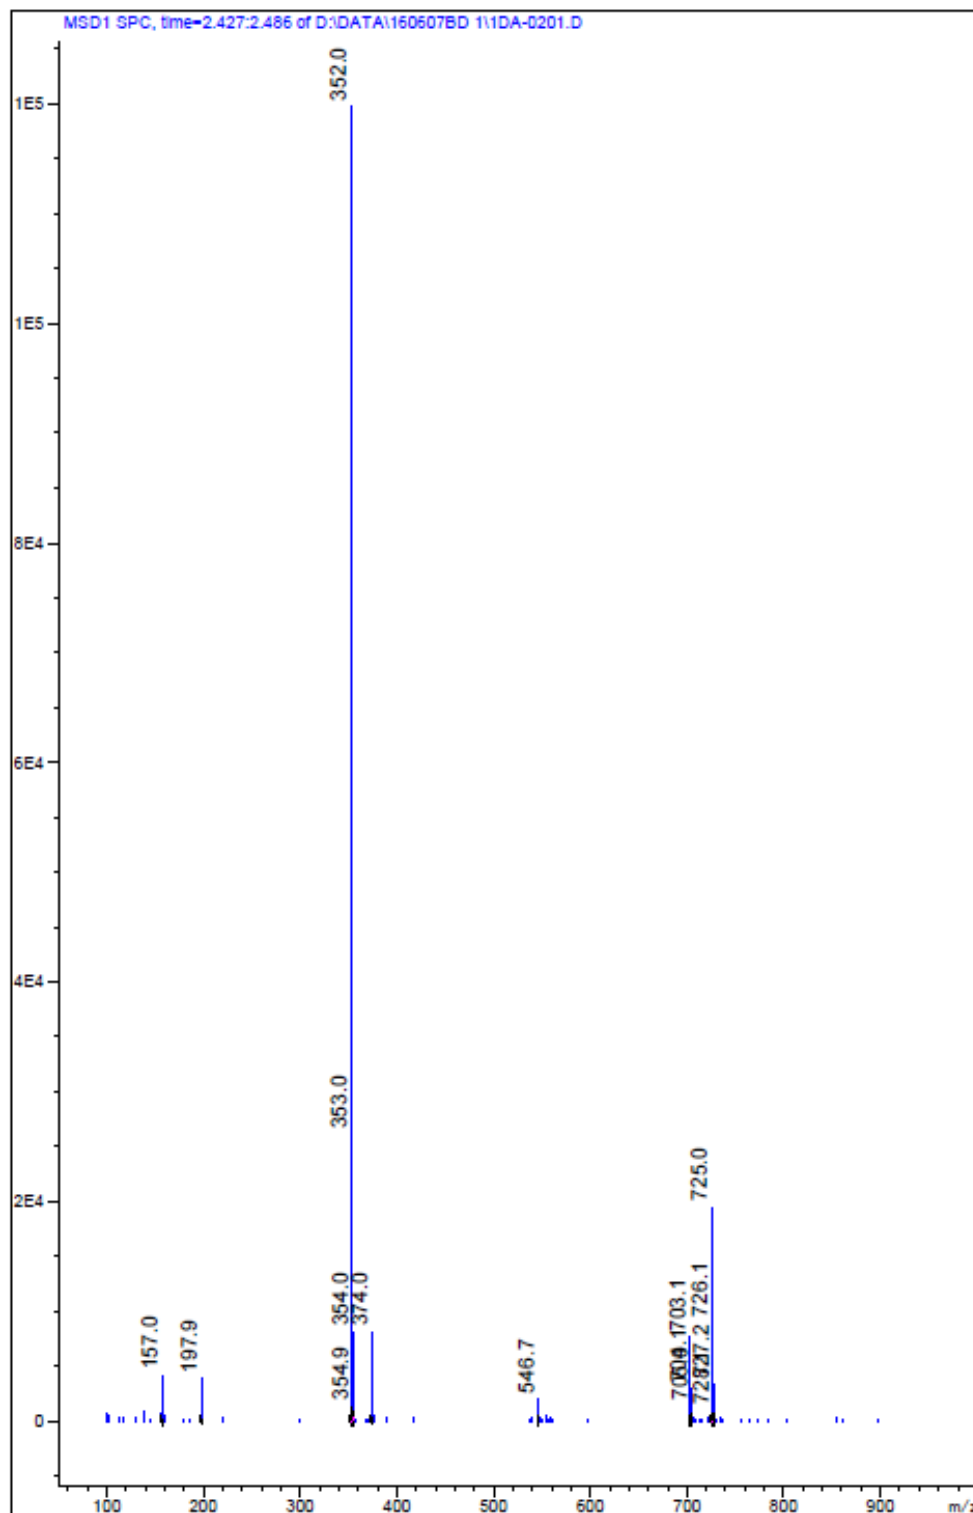

## HPLC REPORT

Compound ID :  
Filename/Sample ID: ET9659-164-P1H  
Injection Date : 6/4/2016 3:42:32 PM  
Injection Vol : 1ul  
Location : tray1 vial13  
Acq Method : D:\method\10-80HPLC.lcm  
Org DataFile : D:\data\2016\1606\160604\ET9659-164-P1H.lcd  
Instrument & Column: HPLC-015(11#-312) Xtridge RP18, 5um

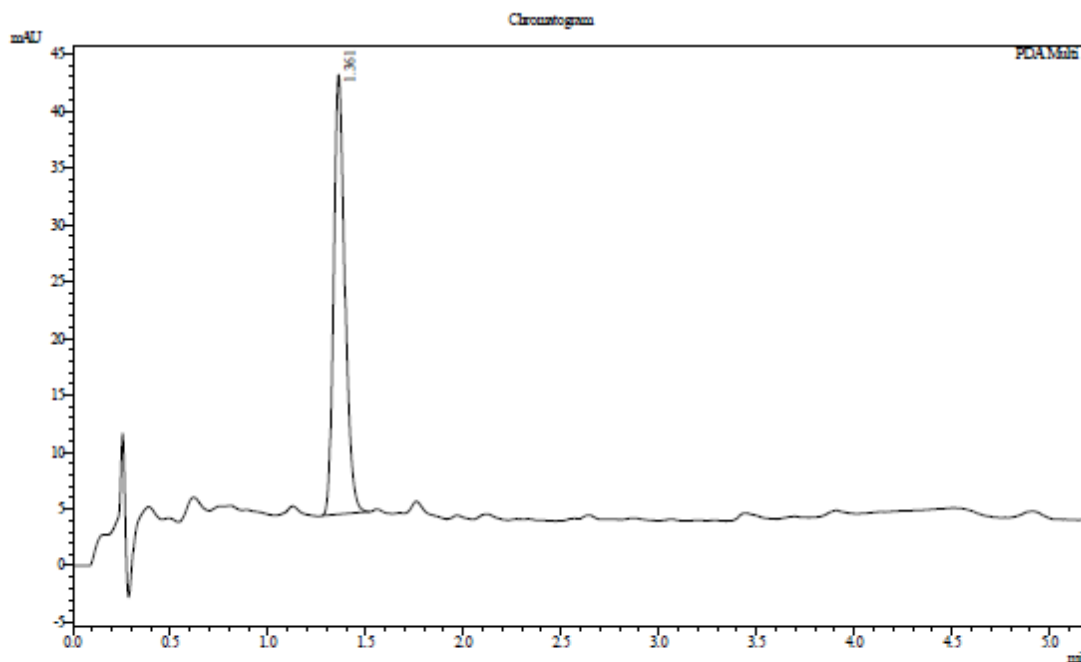

---

---

### Integration Result

---

---

| Peak# | Ret. Time | Height | Height % | USP Width | Area   | Area %  |
|-------|-----------|--------|----------|-----------|--------|---------|
| 1     | 1.361     | 37259  | 100.000  | 0.107     | 155743 | 100.000 |

Operator: \_\_\_\_\_

Date: \_\_\_\_\_

BB0221:

Compound ID: BB0221

ET12347-184-P1BB DMSO Bruker\_C\_400MHz

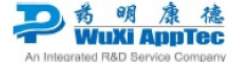

8.446  
8.427  
7.581  
7.561  
7.541  
7.487  
7.469  
7.411  
7.295  
7.278

4.565  
4.540  
4.362  
4.340  
4.321  
4.233  
4.208  
4.191  
4.172  
4.078  
4.063  
3.219  
2.367  
2.333  
2.315  
2.298  
2.170  
2.144  
2.017  
1.972  
1.955

Acquisition Time (sec) 2.0447  
Comment ET12347-1  
84-P1BB  
DMSO  
Bruker\_C\_  
400MHz  
Date 16 Feb  
2017  
14:20:59  
Frequency (MHz) 400.1500  
Nucleus 1H  
Number of Transients 8  
Origin spect  
Original Points Count 16384  
Owner nmr  
Points Count 65536  
Pulse Sequence zg30  
Receiver Gain 92.44  
SW(cyclical) (Hz) 8012.82  
Solvent DMSO-d6  
Spectrum Offset (Hz) 2468.2207  
Spectrum Type standard  
Sweep Width (Hz) 8012.70  
Temperature (degree C) -273.000

Supervisor: Qiang Han

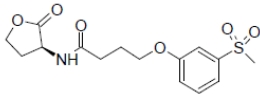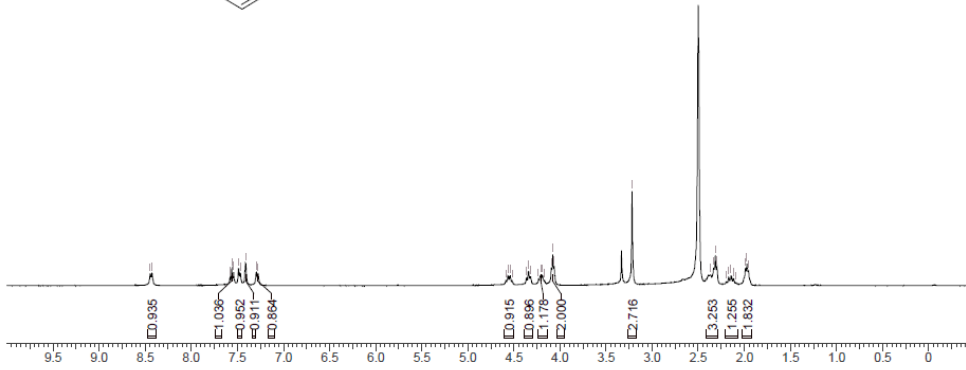

Confidential. For research only Not for regulatory filing

Operator:

Date:



LCMS REPORT

Compound ID : BB0221  
Sample ID : ET12347-164-P1A1  
Injection Date : 16. Feb. 2017  
Inj. Vol. : 0.50 ul  
Location : P2-B-02  
Acq Method : D:\DATA\170216H-G\WUXIAB01\_W.M  
Data Filename : D:\DATA\170216H-G\2BB-2201.D  
Instrument : H

->

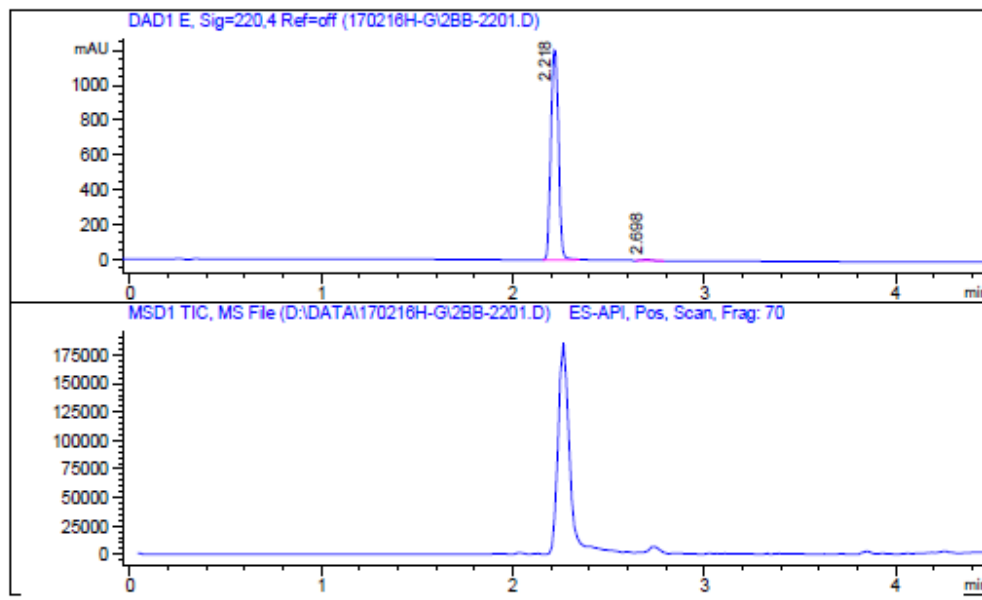

Integration Result

Signal 1 : DAD1 E, Sig=220,4 Ref=off

| Peak # | RT [min] | Height   | Height % | Width [min] | Area     | Area % |
|--------|----------|----------|----------|-------------|----------|--------|
| 1      | 2.218    | 1220.948 | 99.500   | 0.044       | 3312.138 | 99.476 |
| 2      | 2.698    | 6.134    | 0.500    | 0.045       | 17.432   | 0.524  |

Operator: \_\_\_\_\_

Date: \_\_\_\_\_

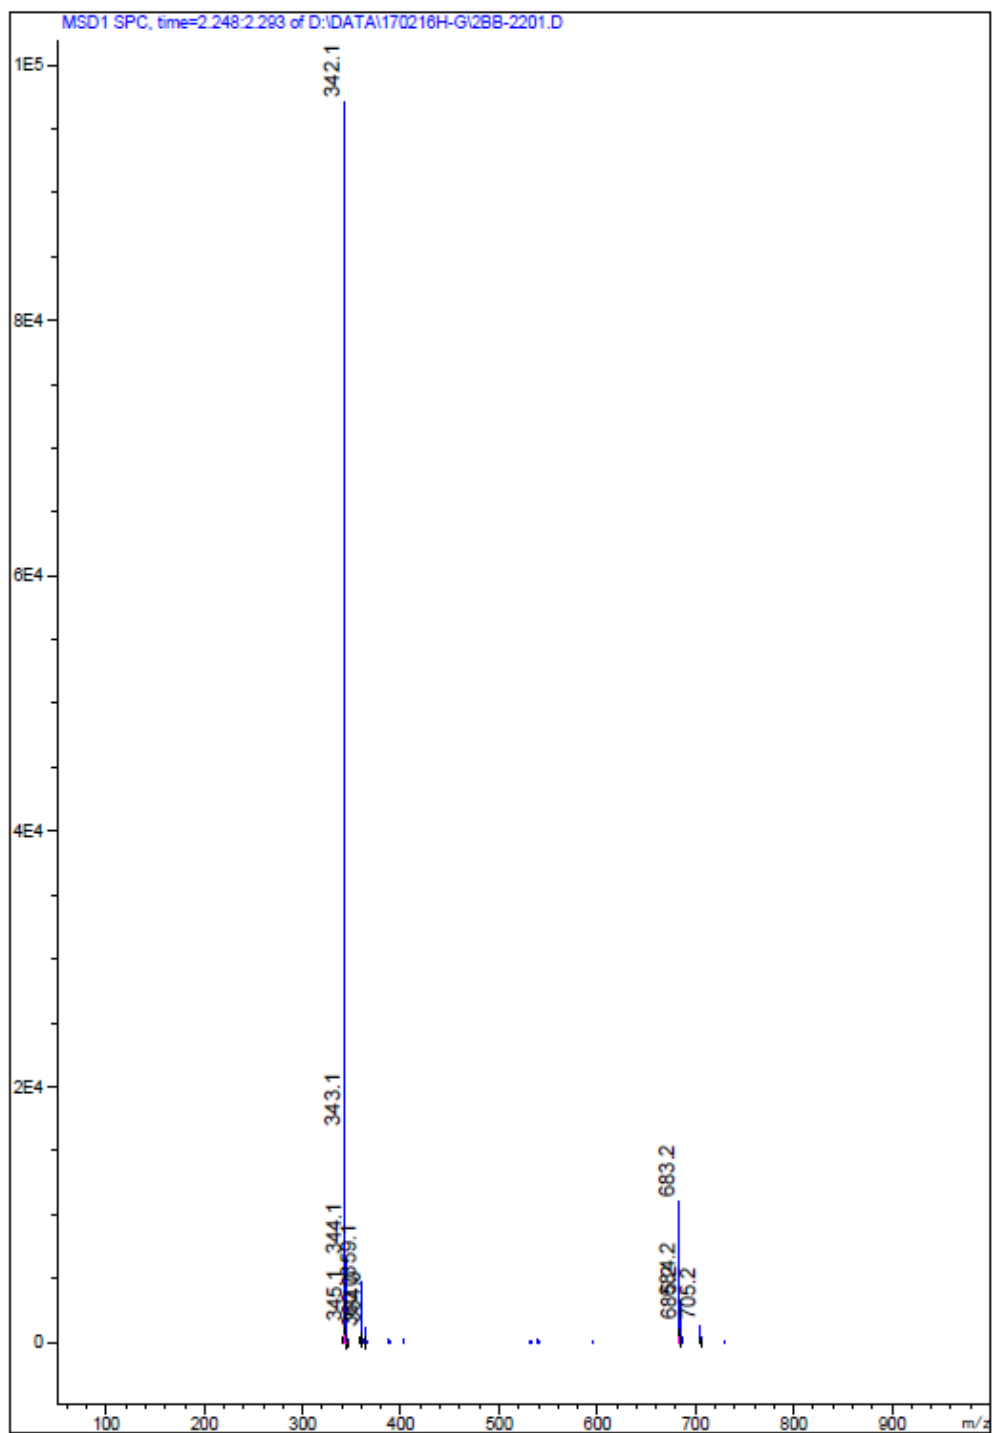

BB0231:

Compound ID: BB0231

ET9659-608-P1N CDCl3 Varian\_T\_400MHz

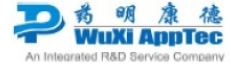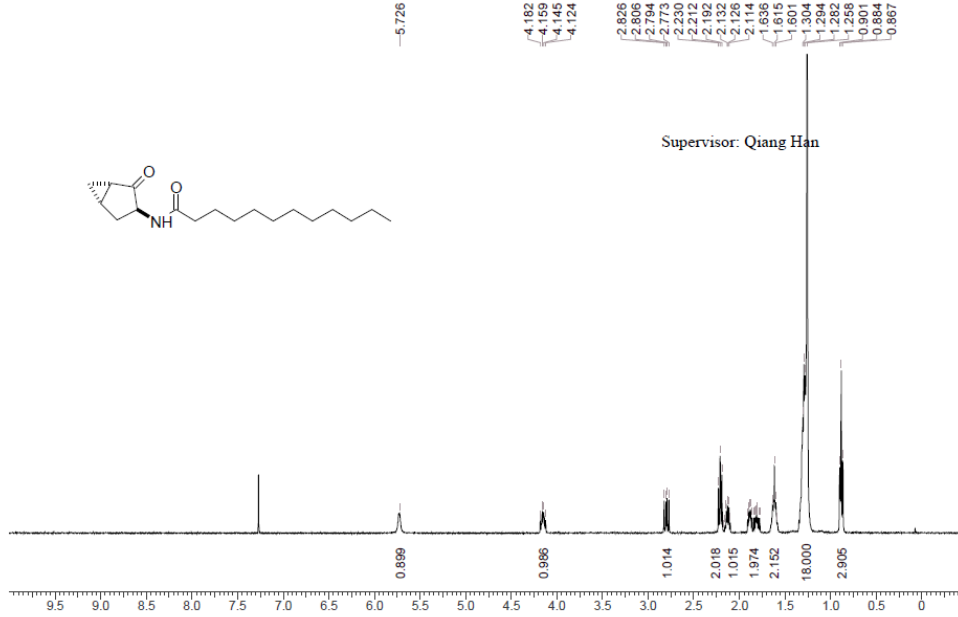

Acquisition Time (sec) 2.2807  
Comment ET9659-608-P1N CDCl3 Varian\_T\_400MHz  
Date Mar 15 2017  
Frequency (MHz) 399.9124  
Nucleus 1H  
Number of Transients 8  
Original Points Count 16384  
Points Count 16384  
Pulse Sequence s2pul  
Receiver Gain 48.00  
SW(cyclical) (Hz) 7183.91  
Solvent CHLORO FORM-d  
Spectrum Offset (Hz) 2803.6741  
Spectrum Type standard  
Sweep Width (Hz) 7183.91  
Temperature (degree C) AMBIENT TEMPERATURE

Confidential. For research only Not for regulatory filing

Operator:

Date:

LCMS REPORT

Compound ID : BB0231  
Sample ID : ET9659-608-P1K  
Injection Date : 15. Mar. 2017  
Inj. Vol. : 0.7 ul  
Location : P1-B-04  
Acq Method : D:\DATA\170315K-D\WUXIAB10.M  
Data Filename : D:\DATA\170315K-D\1BD-4001.D  
Instrument : K

->

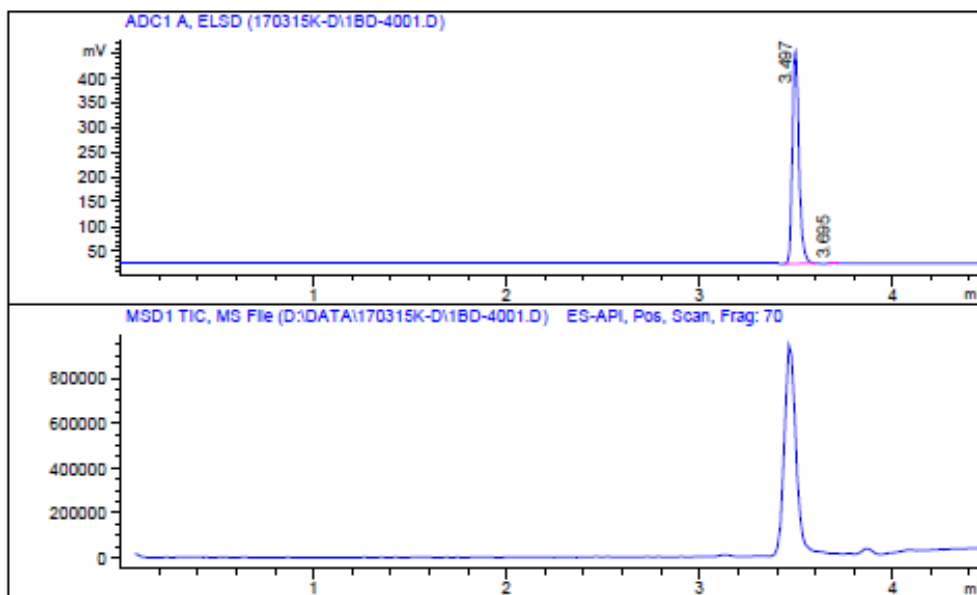

Integration Result

Signal 1 : ADC1 A, ELSD

| Peak # | RT [min] | Area     | Height  | Height % | Width [min] | Area % |
|--------|----------|----------|---------|----------|-------------|--------|
| 1      | 3.497    | 1016.314 | 435.194 | 99.809   | 0.039       | 99.863 |
| 2      | 3.695    | 1.395    | 0.635   | 0.191    | 0.028       | 0.137  |

Operator: \_\_\_\_\_

Date: \_\_\_\_\_

Confidential. For research only NOT for regulatory filing

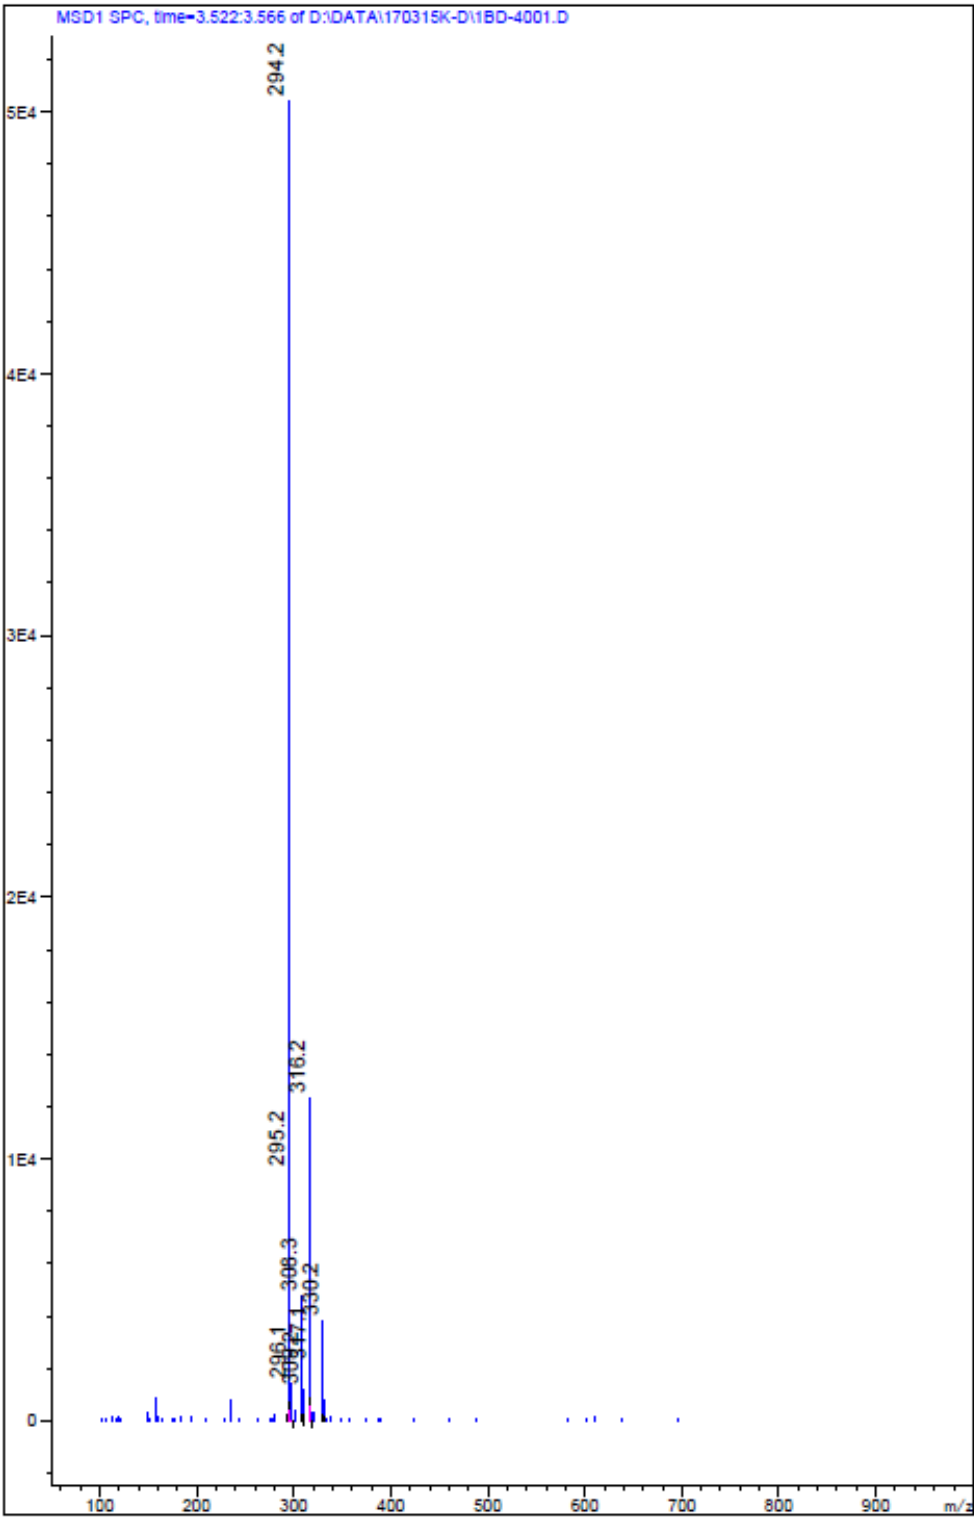

BB0232:

Compound ID: BB0232

ET12347-231-P1AA CDCI3 Varian\_Y\_400MHz

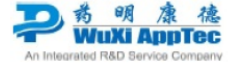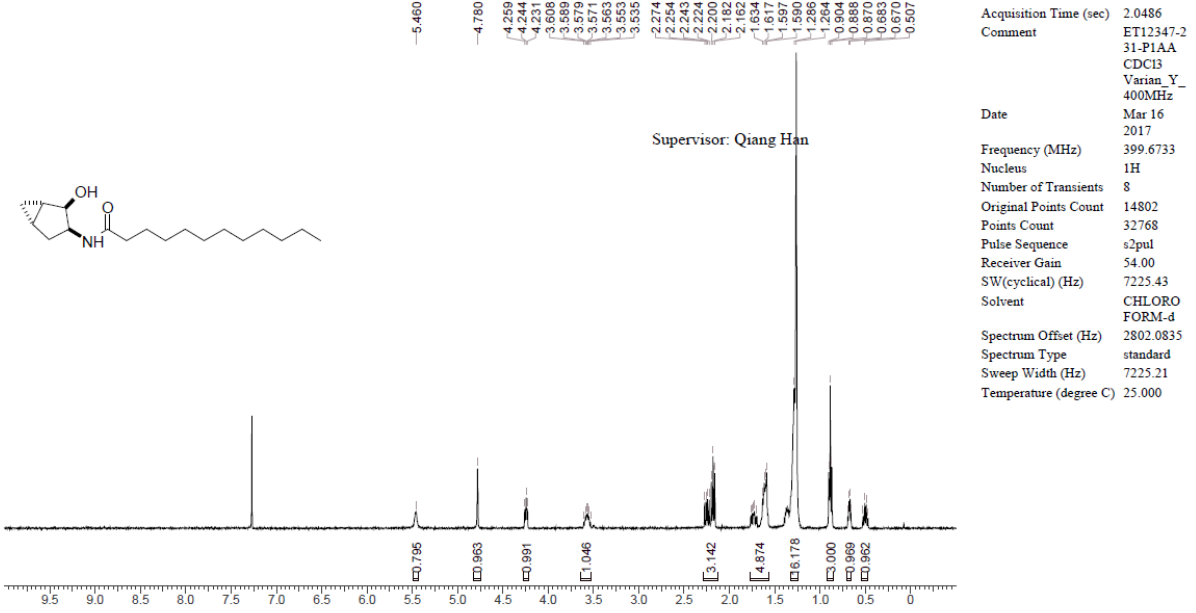

Confidential. For research only Not for regulatory filing

Operator:

Date:

Confidential. For research only NOT for regulatory filing

LCMS REPORT

Compound ID : BB0232  
Sample ID : ET12347-231-PIA1  
Injection Date : 16. Mar. 2017  
Inj. Vol. : 0.7 ul  
Location : P1-B-06  
Acq Method : D:\DATA\170316K-D\WUXIAB10.M  
Data Filename : D:\DATA\170316K-D\1BF-2901.D  
Instrument : K

->

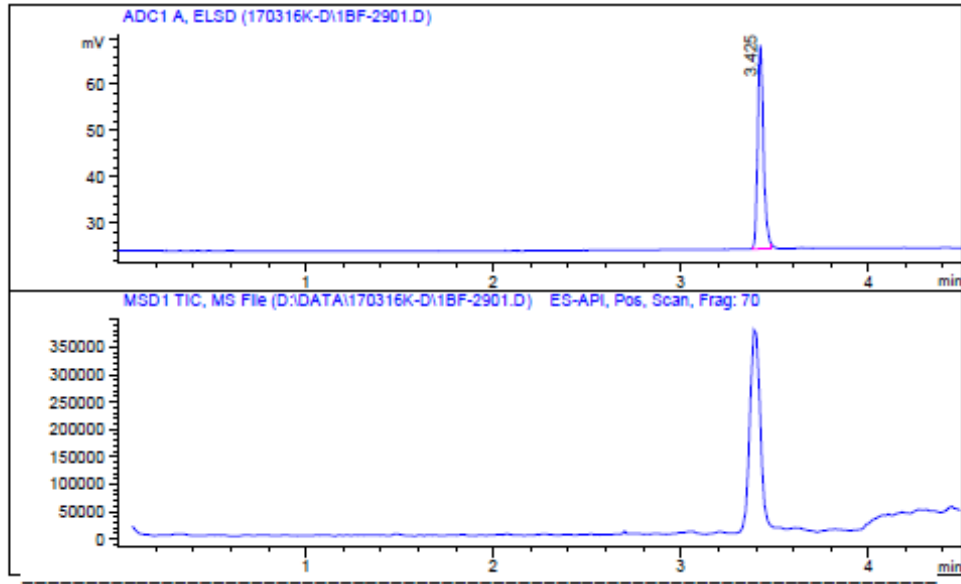

Integration Result

Signal 1 : ADC1 A, ELSD

| Peak # | RT [min] | Area   | Height | Height % | Width [min] | Area %  |
|--------|----------|--------|--------|----------|-------------|---------|
| 1      | 3.425    | 94.781 | 43.845 | 100.000  | 0.033       | 100.000 |

Operator: \_\_\_\_\_

Date: \_\_\_\_\_

MS Spectrum

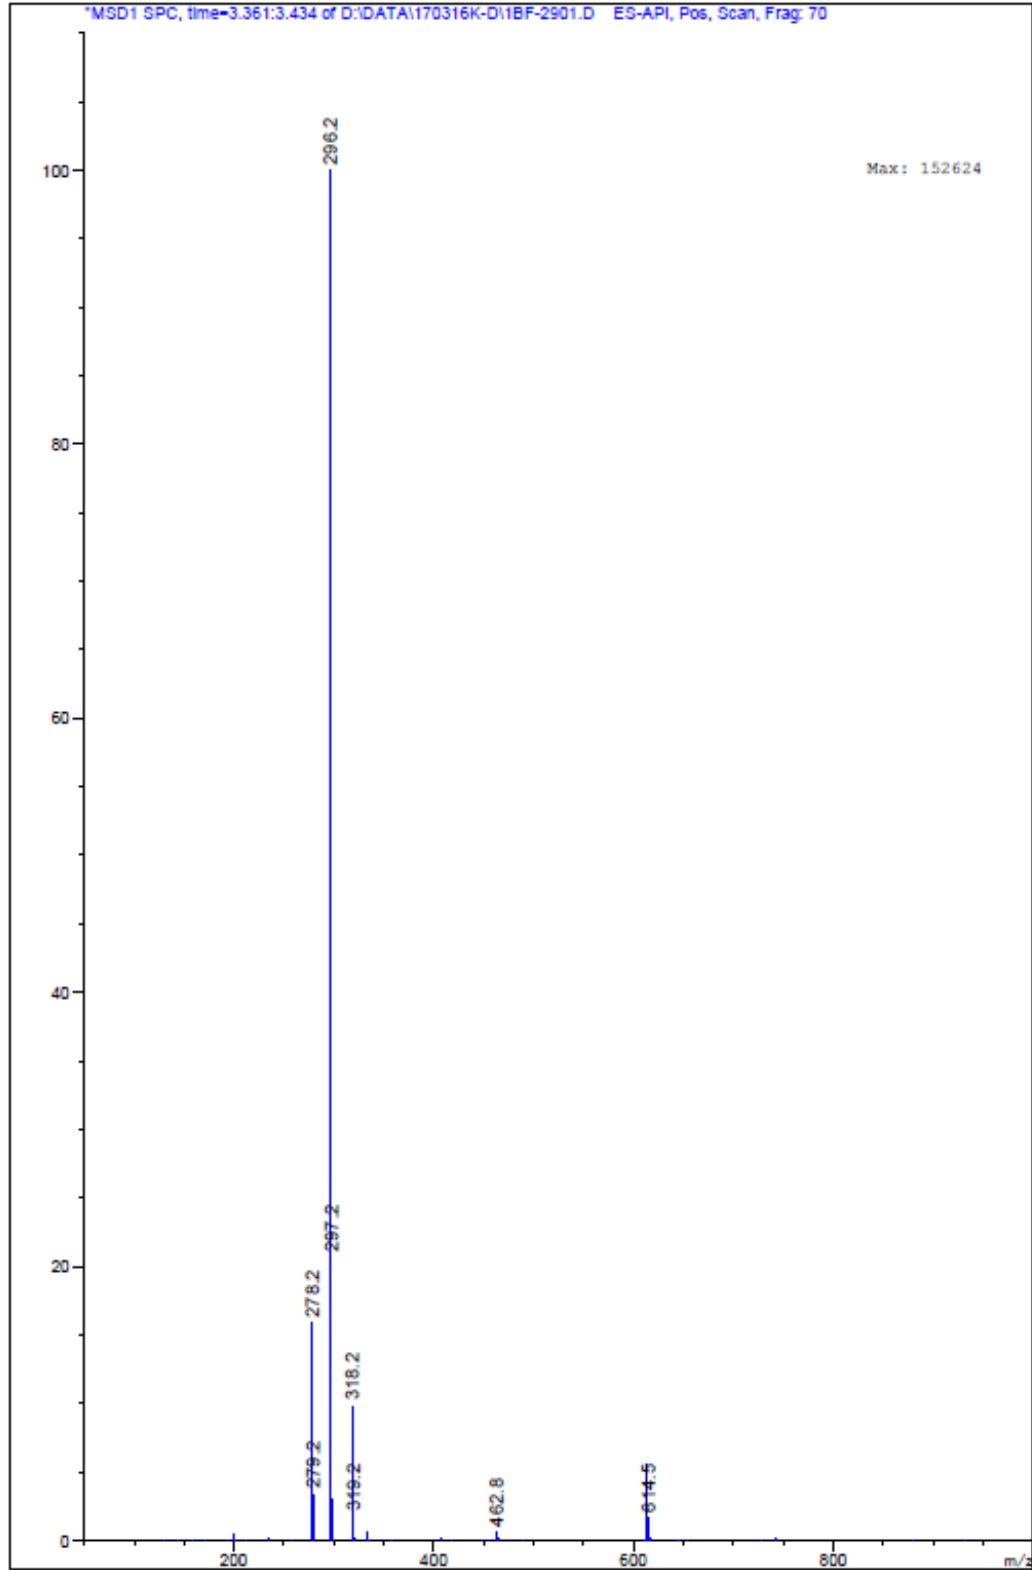



BB0233:

Compound ID: BB0233

ET12347-255-P1AA CDCl3 Varian\_Y\_400MHz

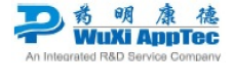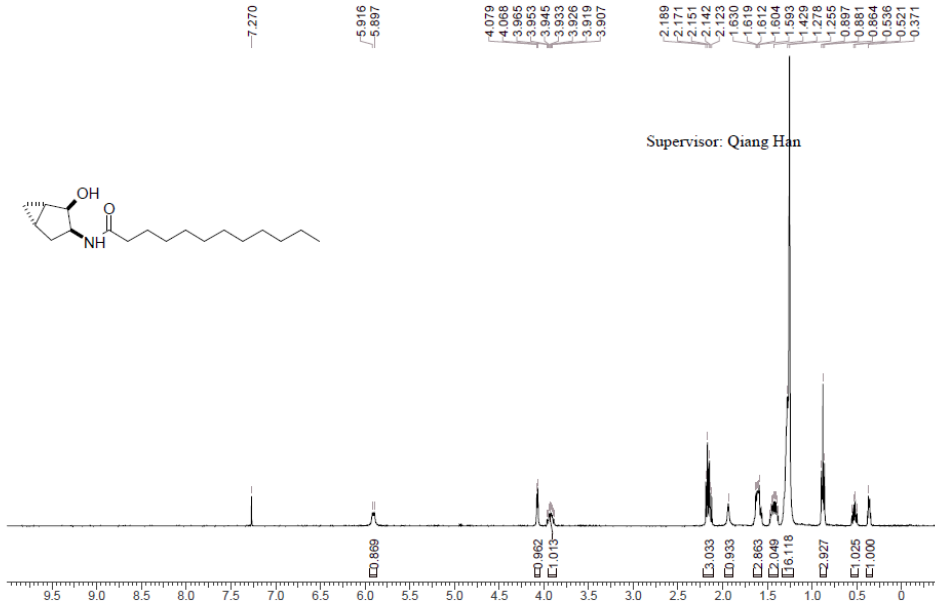

Acquisition Time (sec) 2.0486  
Comment ET12347-2  
55-P1AA  
CDCl3  
Varian\_Y\_400MHz  
Date Mar 27 2017  
Frequency (MHz) 399.6733  
Nucleus 1H  
Number of Transients 8  
Original Points Count 14802  
Points Count 32768  
Pulse Sequence s2pul  
Receiver Gain 44.00  
SW(cyclical) (Hz) 7225.43  
Solvent CHLORO FORM-d  
Spectrum Offset (Hz) 2802.0881  
Spectrum Type standard  
Sweep Width (Hz) 7225.21  
Temperature (degree C) 25.000

Confidential. For research only Not for regulatory filing

Operator:

Date:

LCMS REPORT

Compound ID : BB0233  
Sample ID : ET12347-255-P1A1  
Injection Date : 28. Mar. 2017  
Inj. Vol. : 0.70ul  
Location : P2-B-05  
Acq Method : D:\DATA\170328H-G\WUXIAB25.M  
Data Filename : D:\DATA\170328H-G\2BE-1401.D  
Instrument : H

->

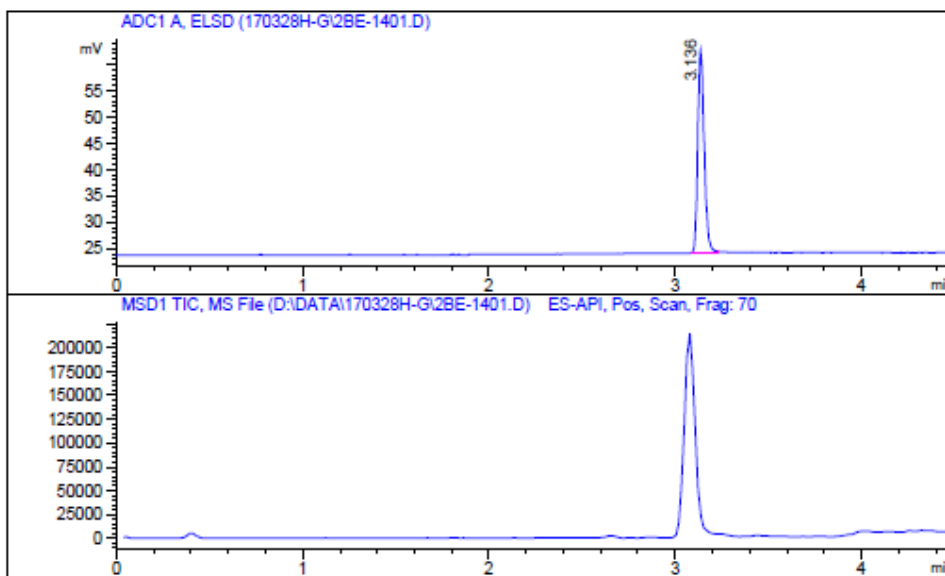

Integration Result

Signal 1 : ADC1 A, ELSD

| Peak # | RT [min] | Height | Height % | Width [min] | Area   | Area %  |
|--------|----------|--------|----------|-------------|--------|---------|
| 1      | 3.136    | 38.588 | 100.000  | 0.037       | 93.116 | 100.000 |

Operator: \_\_\_\_\_

Date: \_\_\_\_\_

Confidential. For research only NOT for regulatory filing

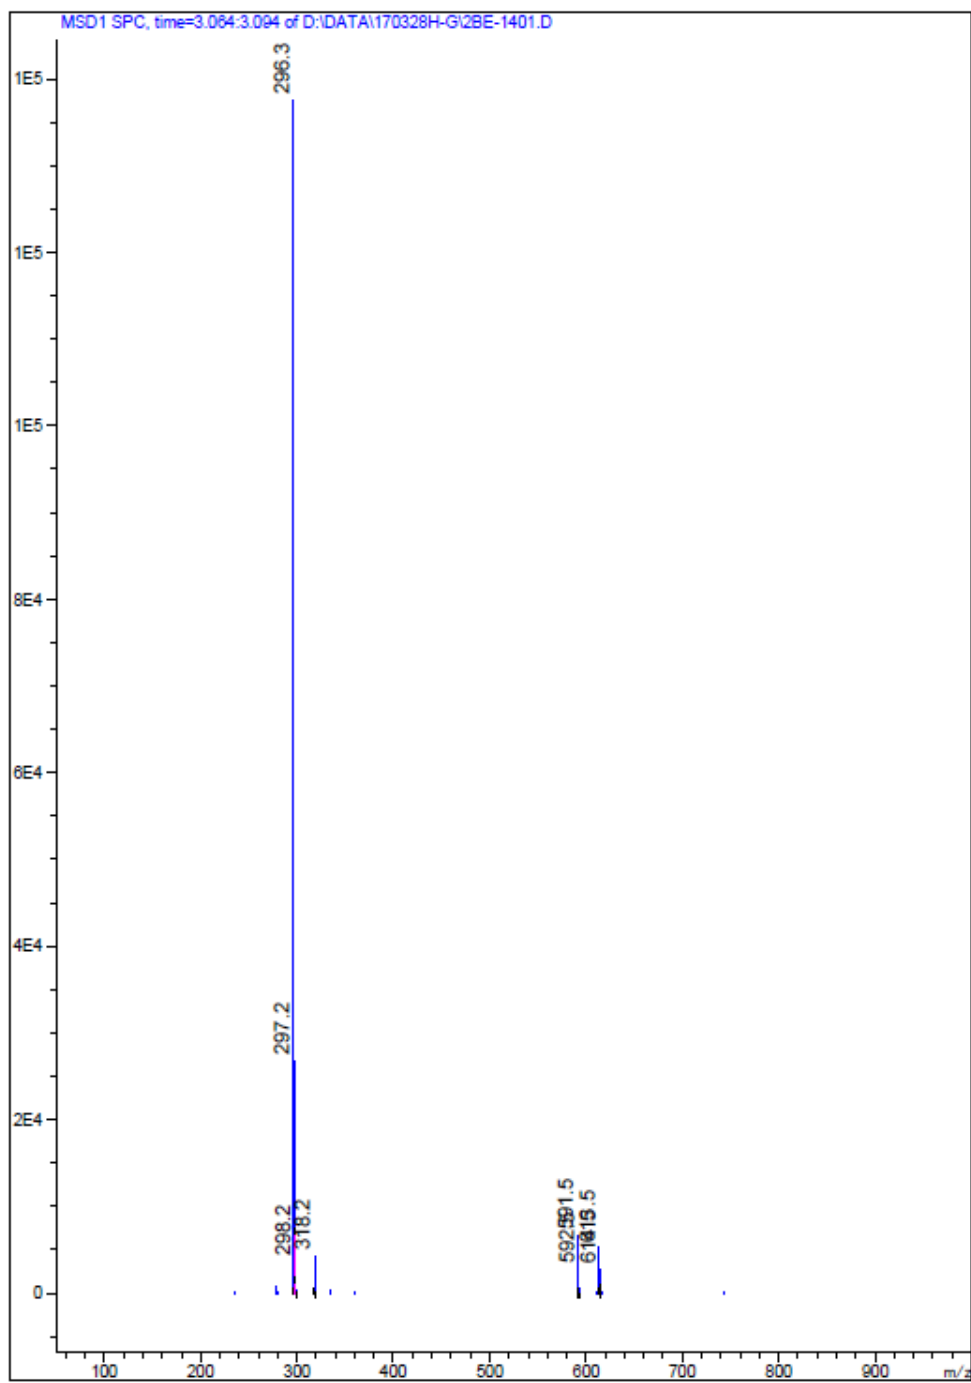

BB0272:

Compound ID: BB0272

ET12347-481-P1AA CDCI3 Bruker\_E\_400MHz

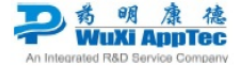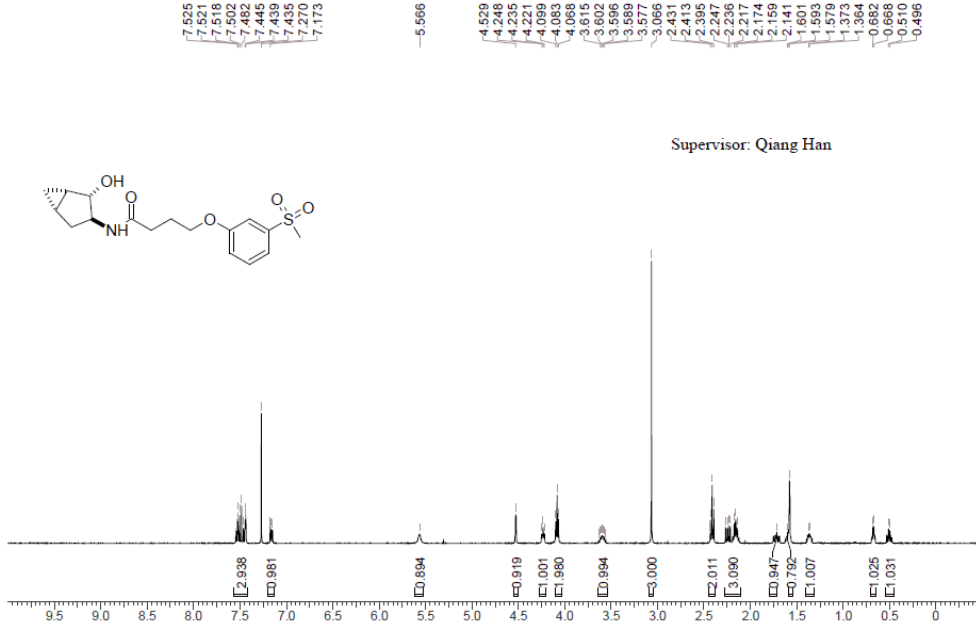

Acquisition Time (sec) 2.0447  
Comment ET12347-4  
81-P1AA  
CDCI3  
Bruker\_E\_  
400MHz  
Date 19 Jul  
2017  
18:21:04  
Frequency (MHz) 400.1300  
Nucleus 1H  
Number of Transients 8  
Origin spect  
Original Points Count 16384  
Owner nmr  
Points Count 65536  
Pulse Sequence zg30  
Receiver Gain 174.64  
SW(cyclical) (Hz) 8012.82  
Solvent CHLORO  
FORM-d  
Spectrum Offset (Hz) 2465.2009  
Spectrum Type standard  
Sweep Width (Hz) 8012.70  
Temperature (degree C) -273.000

Confidential. For research only Not for regulatory filing

Operator:

Date:

LCMS REPORT

Compound ID : BB0272  
Sample ID : ET12347-481-P1A1  
Injection Date : 20. Jul. 2017  
Inj. Vol. : 2.0 ul  
Location : D1F-E1  
Acq Method : D:\Method\WUXIAB01.M  
Data Filename : D:\DATA\170719AN-D2\D1F-E1008.D  
Instrument : AN

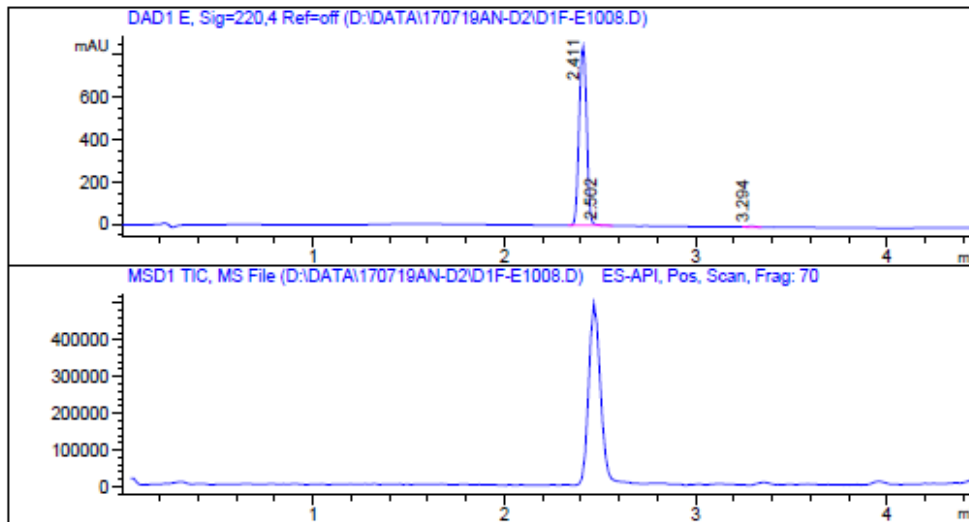

Integration Result

Signal 1 : DAD1 E, Sig=220,4 Ref=off

| Peak # | RT [min] | Area     | Height  | Height % | Width [min] | Area % |
|--------|----------|----------|---------|----------|-------------|--------|
| 1      | 2.411    | 2288.674 | 846.584 | 99.354   | 0.045       | 99.427 |
| 2      | 2.502    | 4.191    | 2.044   | 0.240    | 0.034       | 0.182  |
| 3      | 3.294    | 8.993    | 3.461   | 0.406    | 0.043       | 0.391  |

Operator: \_\_\_\_\_

Date: \_\_\_\_\_

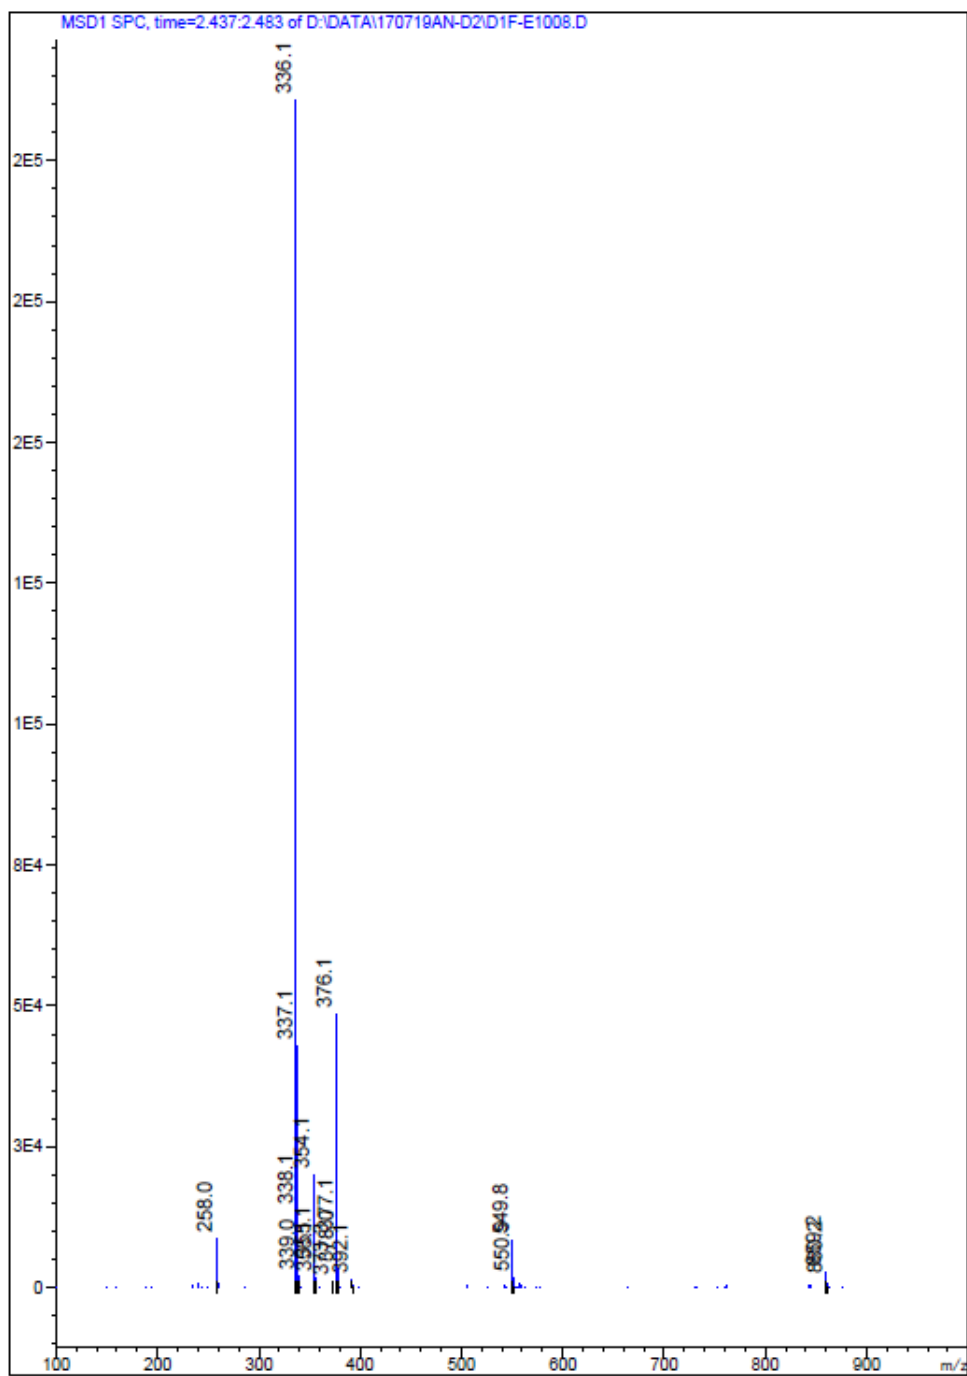

BB0273:

Compound ID: BB0273

ET12347-480-P1BB CDCl3 Bruker\_C\_400MHz

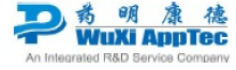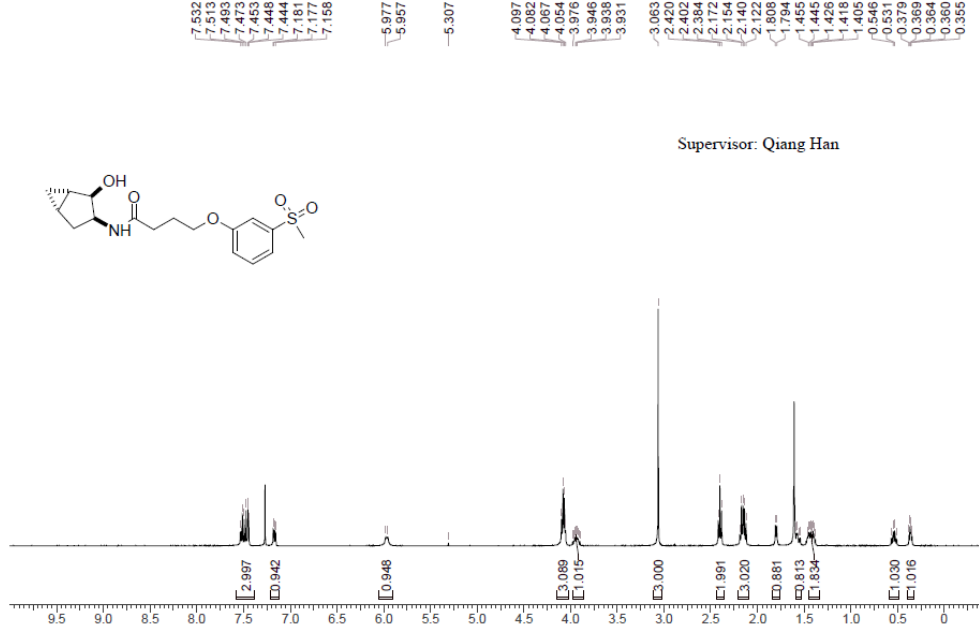

Supervisor: Qiang Han

Acquisition Time (sec) 2.0447  
Comment ET12347.4  
80-P1BB  
CDCl3  
Bruker\_C\_400MHz  
Date 19 Jul 2017 13:42:34  
Frequency (MHz) 400.1500  
Nucleus 1H  
Number of Transients 8  
Origin spect  
Original Points Count 16384  
Owner nmr  
Points Count 65536  
Pulse Sequence zg30  
Receiver Gain 115.64  
SW(cyclical) (Hz) 8012.82  
Solvent CHLORO FORM-d  
Spectrum Offset (Hz) 2465.0835  
Spectrum Type standard  
Sweep Width (Hz) 8012.70  
Temperature (degree C) 25.614

Confidential. For research only Not for regulatory filing

Operator:

Date:

LCMS REPORT

Compound ID : BB0273  
Sample ID : ET12347-480-P1A1  
Injection Date : 19. Jul. 2017  
Inj. Vol. : 2.0 ul  
Location : P1-D-04  
Acq Method : D:\DATA\170719K-D\WUXIAB01\_W.M  
Data Filename : D:\DATA\170719K-D\1DD-8001.D  
Instrument : K

->

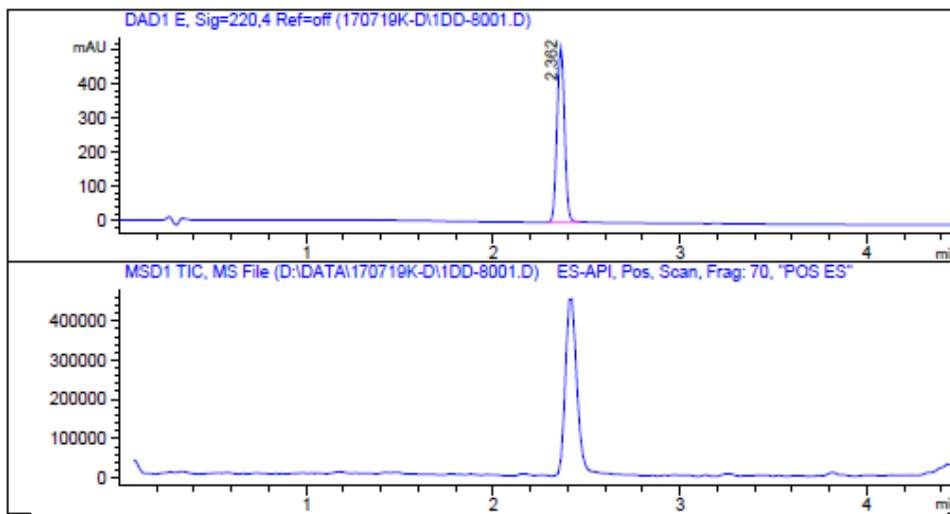

Integration Result

Signal 1 : DAD1 E, Sig=220,4 Ref=off

| Peak # | RT [min] | Area     | Height  | Height % | Width [min] | Area %  |
|--------|----------|----------|---------|----------|-------------|---------|
| 1      | 2.362    | 1456.844 | 513.269 | 100.000  | 0.045       | 100.000 |

Operator: \_\_\_\_\_

Date: \_\_\_\_\_



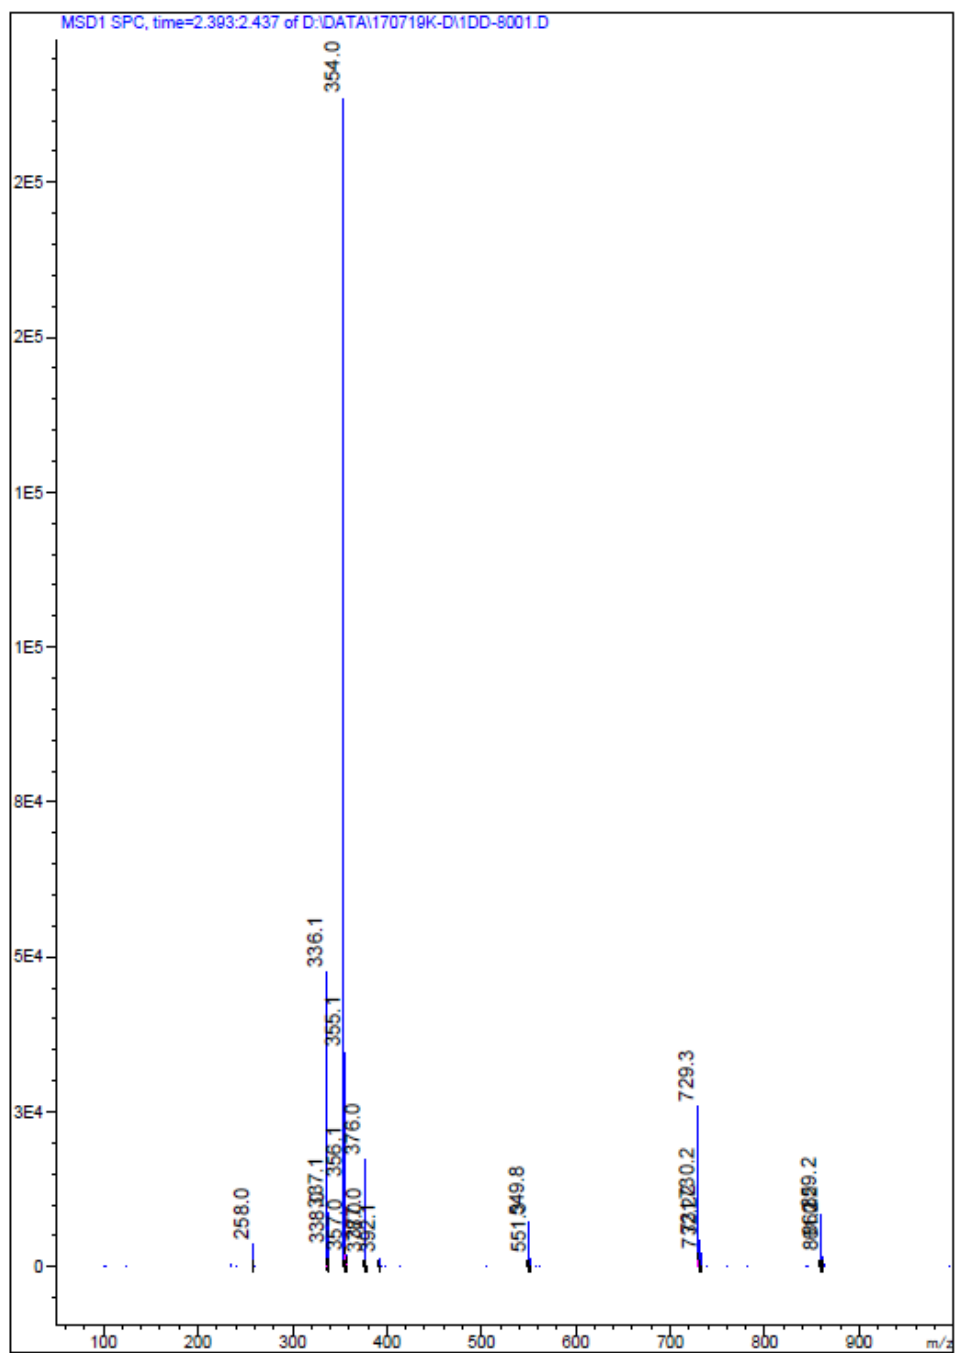

## REFERENCES

1. Kukavica-Ibrulj, I., Bragonzi, A., Paroni, M., Winstanley, C., Sanschagrin, F., O'Toole, G. A., and Levesque, R. C. (2008) In vivo growth of *Pseudomonas aeruginosa* strains PAO1 and PA14 and the hypervirulent strain LESB58 in a rat model of chronic lung infection, *J Bacteriol* 190, 2804-2813.
2. Mukherjee, S., Moustafa, D., Smith, C. D., Goldberg, J. B., and Bassler, B. L. (2017) The RhIR quorum-sensing receptor controls *Pseudomonas aeruginosa* pathogenesis and biofilm development independently of its canonical homoserine lactone autoinducer, *PLoS Pathog* 13, e1006504.
3. Paczkowski, J. E., Mukherjee, S., McCreedy, A. R., Cong, J. P., Aquino, C. J., Kim, H., Henke, B. R., Smith, C. D., and Bassler, B. L. (2017) Flavonoids Suppress *Pseudomonas aeruginosa* Virulence through Allosteric Inhibition of Quorum-sensing Receptors, *J Biol Chem* 292, 4064-4076.
4. Simon, R., Priefer, U., and Puhler, A. (1983) A broad host range mobilization system for in vivo genetic-engineering—Transposon mutagenesis in Gram negative bacteria. *Biol. Technology* 1:784-791.
5. Borlee, B. R., Geske, G. D., Blackwell, H. E., and Handelsman, J. (2010) Identification of synthetic inducers and inhibitors of the quorum-sensing regulator LasR in *Pseudomonas aeruginosa* by high-throughput screening, *Appl Environ Microbiol* 76, 8255-8258.
6. Schweizer, H. P. (1991) *Escherichia-Pseudomonas* shuttle vectors derived from pUC18/19, *Gene* 97, 109-121.
